# Supplementary material for: An orthogonal O,S-CKA monomer for the introduction of thioester and/or thionoester functionalities by radical polymerization
Source: Royal Society of Chemistry journal article supplement (doi:10.1039/d3py00502j), 2023-01-01
Supplement: d3py00502j1.pdf [file d3py00502j1.pdf]

## Supplementary Information

### Orthogonal *O,S*-CKA Monomer for the Introduction of Thioesters and/or Thionoester Functionalities by Radical Polymerization

Marlena Pięta,<sup>a</sup> Vishal B. Purohit,<sup>a</sup> Piotr Paneth,<sup>a</sup> Joanna Pietrasik,<sup>b</sup> Le Li,<sup>c,d</sup>  
Christopher M. Plummer<sup>\*a</sup>

<sup>a</sup> International Centre for Research on Innovative Biobased Materials (ICRI-BioM) – International Research Agenda, Lodz University of Technology, Zeromskiego 116, 90-924 Lodz, Poland

<sup>b</sup> Institute of Polymer and Dye Technology, Faculty of Chemistry, Lodz University of Technology, Zeromskiego 116, 90-924 Lodz, Poland

<sup>c</sup> Key Laboratory for Polymeric Composite and Functional Materials of Ministry of Education, Sun Yat-sen University, Guangzhou 510275, P. R. China

<sup>d</sup> School of Chemistry, Sun Yat-sen University, Guangzhou, 510275, P. R. China

\*E-mail: christopher.plummer@p.lodz.pl

#### Table of Contents

|     |                                                                      |    |
|-----|----------------------------------------------------------------------|----|
| 1.  | Materials                                                            | 2  |
| 2.  | Instrumentation and Analysis                                         | 3  |
| 3.  | Experimental Procedures                                              | 5  |
|     | 3.1 - Synthesis of monomer <i>O,S</i> -BMDO                          | 5  |
|     | 3.2 - Polymerization                                                 | 7  |
|     | 3.3 - Chemical degradation                                           | 8  |
| 4.  | <sup>1</sup> H and <sup>13</sup> C NMR spectra                       | 9  |
|     | 4.1 - Monomers & intermediates                                       | 9  |
|     | 4.2 - Polymers                                                       | 12 |
| 5.  | GPC of styrene and <i>O,S</i> -BMDO copolymers                       | 20 |
| 6.  | Conversion                                                           | 21 |
| 7.  | Reactivity Ratios (Mayo-Lewis, Fineman-Ross and Kelen-Tüdős Methods) | 23 |
| 8.  | Degradation                                                          | 26 |
| 9.  | Cartesian Coordinates and Energies (a.u.) of Stationary Points       | 28 |
| 10. | Elemental Composition Reports                                        | 50 |

## 1. Materials

The following chemicals were used as received: 2-methylbenzoic acid (97%, AmBeed), *N*-bromosuccinimide (NBS, >99%, Glentham Life Sciences), 2,2'-azobis(2-methylproprionitrile) (AIBN, >98%, Sigma Aldrich), potassium thioacetate (>98%, Glentham Life Sciences), lithium aluminium hydride (LiAlH<sub>4</sub>, 95%, powder, Sigma-Aldrich), cobalt (II) chloride anhydrous (pure p. a., Chempur), trimethylsilyl chloride (TMSCl, 98%, Thermo Scientific), chloroacetaldehyde dimethyl acetal (98%, Sigma Aldrich), potassium tert-butoxide (>98%, Thermo Scientific), conc. H<sub>2</sub>SO<sub>4</sub> (pure p. a., Chempur), sodium bicarbonate (pure p. a., Eurochem), ammonium chloride (pure p. a., Eurochem), anhydrous sodium sulfate (pure p. a., Eurochem), acrylamide (AM, 98%, Glentham Life Sciences), allyl acetate (AAc, 99%, Thermo Scientific), potassium permanganate (KMnO<sub>4</sub>, pure p. a., Chempur), chloroform-*d* (CDCl<sub>3</sub>, 99.8%, Deutero), acetone-*d*6 (99.0%, Deutero) and dimethylsulfoxide-*d*6 (DMSO-*d*6, 99.8%, Deutero).

Styrene (Sty, 99%, Alfa Aesar), methyl acrylate (MA, 99% Thermo Scientific), methyl methacrylate (MMA, 99%, Alfa Aesar), *N,N*-dimethyl acrylamide (DMAA, 99%, Sigma-Aldrich), and vinyl acetate (VAc, >99%, TCI) were purified shortly before use by passing through a column of basic Al<sub>2</sub>O<sub>3</sub>.

The following solvents were used as received: ethyl acetate (EtOAc, pure p. a., Chempur), hexane (pure p. a., POCH) chloroform (pure p. a., Chempur, for reaction with AlCl<sub>3</sub>) and anhydrous dimethylformamide (99.8%, Sigma Aldrich). The following solvents were further dried using molecular sieves (3 or 4 Å beads, Honeywell): ethanol (pure p. a., POCH), chloroform (pure p. a., Chempur; for reaction with AIBN and NBS), tetrahydrofuran (THF, pure p. a. Chempur), acetonitrile (MeCN, pure p. a., Chempur), *tert*-butanol (*t*BuOH, > 99%, TCI), and diethyl ether (Et<sub>2</sub>O, pure p.a., POCH).

Analytical thin layer chromatography (TLC) was performed using pre-coated aluminum-sheets (Merck TLC Silicagel 60 F<sub>254</sub>) and visualized by ultraviolet irradiation or KMnO<sub>4</sub> stain. For flash chromatography (FC) silica gel (60, 63-200 μm, Merck KGaA) was used.

## 2. Instrumentations and Analysis

### NMR spectra characterization

Nuclear magnetic resonance spectroscopy ( $^1\text{H}$  NMR) was used to determine the chemical structure of synthesized compound and polymers, as well as for examining monomer conversion during the polymerization reactions. NMR spectra were recorded at 25 °C on a Bruker Ultra Shield 700 instrument, running at 700 MHz for  $^1\text{H}$  NMR and 176 MHz for  $^{13}\text{C}$  NMR, respectively, or on JEOL JNM-ECZL 400R, running at 400 MHz for  $^1\text{H}$  NMR.  $\text{CDCl}_3$ , acetone- $d_6$  and  $\text{DMSO-}d_6$  were used as the solvents. Chemical shifts ( $\delta$ ) are reported in ppm relative to residual solvent signals ( $\text{CDCl}_3$ : 7.26 ppm for  $^1\text{H}$  NMR, 77.16 ppm for  $^{13}\text{C}$  NMR). The resonance multiplicities are described as s (singlet), d (doublet), dd (double doublet), t (triplet), q (quartet) or m (multiplet).

### GPC characterization

Gel permeation chromatography (GPC) was used to determine number average molecular weights ( $M_n$ ) of the synthesized polymers and their dispersity ( $\mathcal{D}$ ). The GPC measurements were performed with a Wyatt (Wyatt, Dernbach, Germany) instrument equipped with two Perfect Separation Solutions (PSS) columns and one guard column (GRAM Linear, 10  $\mu\text{m}$ ,  $M_n$  from 800 to 1,000,000 g/mol), utilizing a differential refractometer (RI) and a multi-angle light scattering (MALS) detector. The measurements were performed in DMF, containing 50 mmol LiBr, as eluent at a flow rate of 1 mL/min. Linear poly(methyl methacrylate) ( $M_n$  from 545 to 2,000,000 g/mol) and polystyrene standards ( $M_n$  from 435 to 2,300,000 g/mol) were used as standards. The samples were filtered through nylon filters of 0.22  $\mu\text{m}$  pore size before the measurement.

### FT-IR characterization

Fourier transform infrared spectroscopy (FT-IR) was used for the characterization of specific chemical functional groups in the samples. The experiments were performed with the use of Nicolet is50 FT-IR spectrometer (Thermo Fischer Scientific Instruments, Waltham, MA, USA) equipped with diamond Smart Orbit ATR sampling accessory. The data were collected in the mid-infrared region of 500–4000  $\text{cm}^{-1}$  with spectral resolution 2  $\text{cm}^{-1}$  and averaging of 64 scans.

### Mass Spectroscopy

Ultra-performance liquid chromatograph (UPLC) Acquity (Waters Ltd.) equipped with photodiode array detector and combined with LCT Premier XE (Waters Ltd.) mass spectrometer with TOF-analyzer (ultimate instrument spectral resolution of 11,000 FWHM) was used for the chromatographic separation and identification of products **5** and **7**. Separation was performed on a reversed-phase C18 UPLC column (Waters Acquity UPLC BEH C 18 1.7mm, 50  $\times$  2.1 mm) equilibrated with a water/acetonitrile (90/10 v/v) mobile phase containing 0.1% (v/v) trifluoroacetic acid (TFA) at a flow rate of 0.3 mL/min. The injection volume was 2  $\mu\text{L}$ , the sample temperature was 20 °C, and the column temperature was 40 °C. The electrospray source was operated at positive ion mode using the following

parameters: capillary voltage 2.8 kV, sample cone voltage 60 V, desolvation temp. 350 °C, source temp. 100 °C, desolvation gas flow 800 L/h, and cone gas flow 50 L/h. The MCP detector voltage was 2.5 kV.

### 3. Experimental Procedures

#### 3.1 – Synthesis of monomer *O,S*-BMDO (5,6-benzo-2-methylene-1,3-oxthiepane) (**8**)

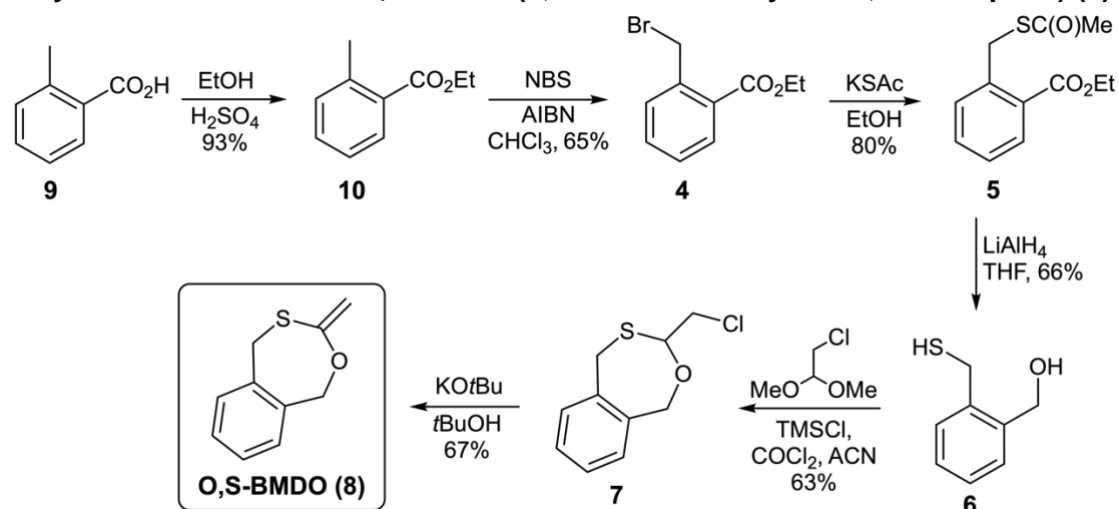

Figure S1. Synthesis of monomer *O,S*-BMDO (**8**).

#### Ethyl 2-methylbenzoate (**10**)

2-Methylbenzoic acid (**9**) (10.0 g, 73.4 mmol) was dissolved in ethanol (100 mL). To this mixture, 3 Å molecular sieves (6.5 g) and conc. H<sub>2</sub>SO<sub>4</sub> (3.0 ml) were added, and the mixture refluxed for 40 h. Then, ca. 60% of the volume of the reaction mixture was removed under reduced pressure, followed by pouring the mixture into crushed ice with subsequent neutralization with NaHCO<sub>3</sub>. The mixture was then extracted with EtOAc (2 x 100 mL). The organic fractions were combined, dried over Na<sub>2</sub>SO<sub>4</sub>, and concentrated to give 11.2 g of ethyl 2-methylbenzoate (**10**) (93% yield) as colorless oil. Spectroscopic data were consistent with the literature (Bioorg. Med. Chem. Lett., 2011, 21, 7246–7250).

#### 2-Ethoxycarbonylbzyl bromide (**4**)

Ethyl 2-methylbenzoate (**9**) (11.2 g, 68.3 mmol) was dissolved in anhydrous CHCl<sub>3</sub> (120 mL). The mixture was then purged with nitrogen for 10 min before *N*-bromosuccinimide (13.4 g, 75.1 mmol) and AIBN (1.23 g, 7.51 mmol) were added. The mixture was then stirred at reflux for 16 h under nitrogen. The mixture was then cooled and filtered, and the filter cake washed with chloroform (50 mL). After concentration of the filtrate under reduced pressure the resulting crude product was then purified by silica gel column chromatography (hexane:ethyl acetate = 19:1) to provide 10.8 g of 2-ethoxycarbonylbzyl bromide (**4**) as a yellow oil (65% yield). Spectroscopic data were consistent with the literature (Bioorg Med Chem Lett, 2011, 21, 7246–7250).

#### Ethyl 2-(acetylsulfanylmethyl)benzoate (**5**)

2-Ethoxycarbonylbzyl bromide (**4**) (10.8 g, 44.3 mmol) was dissolved in ethanol (100 mL) and potassium thioacetate (5.06 g, 44.3 mmol) was added in portions. The reaction mixture was stirred at RT overnight. When analysis by TLC indicated complete consumption of the starting material, the formed precipitate was filtered and washed with ethanol. The filtrate

was then concentrated *in vacuo* and purified by passage through a silica plug (hexane/chloroform = 1:1). The solution was concentrated to ca. 30 mL and then cooled overnight to allow crystals to form which were then filtered, washed with hexane and dried to give 8.45 g of ethyl 2-(acetylsulfanylmethyl)benzoate (**5**) (80% yield) as colorless crystals.

**MP:** 44-45 °C.

**IR (neat):**  $\nu$  (cm<sup>-1</sup>): 2986, 2976, 1705, 1678, 1269, 1074, 721.

**<sup>1</sup>H NMR (400 MHz, CDCl<sub>3</sub>):**  $\delta$  7.96 (dd, *J* = 7.8, 1.4 Hz, 1H), 7.51 (dd, *J* = 7.6, 1.4 Hz, 1H), 7.44 (td, *J* = 7.5, 1.4 Hz, 1H), 7.32 (td, *J* = 7.7, 1.4 Hz, 1H), 4.48 (s, 2H), 4.38 (q, *J* = 7.1 Hz, 2H), 2.30 (s, 3H), 1.40 (t, *J* = 7.1 Hz, 3H).

**<sup>13</sup>C NMR (176 MHz, CDCl<sub>3</sub>):**  $\delta$  195.76, 167.08, 139.98, 132.51, 131.72, 131.08, 129.13, 127.52, 77.34, 77.16, 76.98, 61.21, 32.37, 30.25, 14.33.

**HRMS:** [M + H]<sup>+</sup> Calc. mass.: 239.0742; Found: 239.0760.

### **(2-(Mercaptomethyl)phenyl)methanol (6)**

Ethyl 2-(acetylsulfanylmethyl)benzoate (**6**) (8.45 g, 35.4 mmol) was dissolved in anhydrous THF (90 mL) and cooled in an ice-bath. To the stirred solution, LiAlH<sub>4</sub> (6.73 g, 177.0 mmol) was added in portions. After 10 minutes, the ice-bath was removed, and the mixture was stirred at room temperature for 3 h. Then, the mixture was chilled again with an ice-bath and quenched by the dropwise addition of sat. aqueous NH<sub>4</sub>Cl while being vigorously stirred. The resulting suspension was then extracted with EtOAc (3 x 100 mL) and the combined organic layers were dried over Na<sub>2</sub>SO<sub>4</sub> and concentrated. The resulting crude product was purified by silica gel column chromatography (hexane/EtOAc = from 19:1 to 3:2) to give 3.6 g of (2-(mercaptomethyl)phenyl)methanol (**6**) (66% yield) as a yellow oil. Spectroscopic data were consistent with the literature (K. E. Giesler, D. C. Liotta J. Med. Chem. 2016, 59, 10244-10252).

### **5,6-Benzo-2-(chloromethyl)-1,3-oxthiepane (7)**

To the solution of (2-(mercaptomethyl)phenyl)methanol (**6**) (3.60 g, 23.4 mmol) in anhydrous acetonitrile (280 mL) was added cobalt chloride (760 mg, 5.85 mmol) and trimethylsilyl chloride (2.97 ml, 23.4 mmol). This was then followed by a dropwise addition of chloroacetaldehyde dimethyl acetal (2.66 ml, 23.4 mmol) in acetonitrile (10 mL). The mixture was stirred at RT for 16 h and then poured into 5% aqueous NaHCO<sub>3</sub> (250 mL). This mixture was then extracted with EtOAc (3 x 200 mL). The organic layers were combined and washed with aqueous NaHCO<sub>3</sub> (250 mL), dried over Na<sub>2</sub>SO<sub>4</sub>, filtered and condensed under reduced pressure. The resulting solid crude was triturated with small amount of Et<sub>2</sub>O (2 x 5 mL) to give 5,6-benzo-2-(chloromethyl)-1,3-oxthiepane (**7**) (63% yield) as gray solid.

**MP:** 94 °C.

**IR (neat):**  $\nu$  (cm<sup>-1</sup>): 3015, 2961, 1452, 1439, 1242, 1057, 761.

**<sup>1</sup>H NMR (400 MHz, CDCl<sub>3</sub>):**  $\delta$  7.17–7.25 (m, 5H), 5.21 (dd, *J* = 7.5, 4.1 Hz), 5.01 (d, *J* = 14.0 Hz), 4.95 (d, *J* = 14.0 Hz), 4.10 (d, *J* = 15.1 Hz), 3.97 (d, *J* = 15.1 Hz), 3.75 (dd, *J* = 11.7, 7.5 Hz, 1H), 3.70 (dd, *J* = 11.7, 4.1 Hz, 1H).

$^{13}\text{C}$  NMR (176 MHz,  $\text{CDCl}_3$ ):  $\delta$  140.15, 137.37, 129.35, 128.56, 127.57, 88.33, 74.41, 46.23, 34.70.

HRMS:  $[\text{M} + \text{H}]^+$  Calc. mass: 215.0297; Found: 215.0302.

### 5,6-Benzo-2-methylene-1,3-oxthiepane (**8**)

Benzo-2-(chloromethyl)-1,3-oxthiepane (**7**) (500 mg, 2.32 mmol) was placed in a screw-cap glass tube and dissolved in *t*BuOH (1 mL) under nitrogen. Then, potassium tert-butoxide (313 mg, 2.79 mmol) was added and the mixture was sealed and stirred at 120 °C for 18 h. The mixture was then cooled to RT and diluted with diethyl ether (10 ml), followed by being filtered to remove the KCl precipitate, with subsequent concentration under reduced pressure. This process was repeated three times. To the combined fractions was then added diethyl ether (30 mL) and the mixture again filtered. The resulting solution was concentrated under reduced pressure to give 277 mg of 5,6-benzo-2-methylene-1,3-oxthiepane (**8**) (67% yield) as a brown oil.

IR (neat):  $\nu$  ( $\text{cm}^{-1}$ ): 3019, 2915, 1604, 1158, 1036, 742.

$^1\text{H}$  NMR (400 MHz,  $\text{CDCl}_3$ ):  $\delta$  7.20–7.24 (m, 2H), 7.09–7.15 (m, 2H), 5.20 (s), 4.78 (d,  $J = 1.1$  Hz, 1H), 4.63 (d,  $J = 1.1$  Hz, 1H), 4.02 (s, 2H).

$^{13}\text{C}$  NMR (176 MHz,  $\text{CDCl}_3$ ):  $\delta$  157.86, 136.86, 136.66, 129.06, 128.10, 127.85, 127.32, 96.86, 73.07, 35.49.

### 3.2 – Polymerization procedures

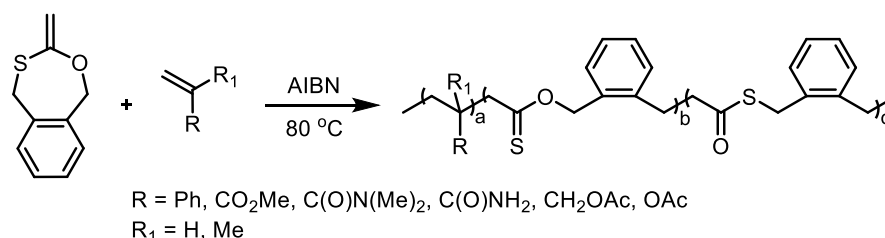

**Figure S2.** Scheme of bulk polymerization of O,S-BMDO (**8**) and comonomer.

#### Typical bulk polymerization procedure for 20% of O,S-BMDO and 80% of comonomer

O,S-BMDO (**8**) (71 mg, 0.4 mmol), comonomer (Sty, MMA, MA, DMAA, AAc, VAc; 1.6 mmol) and AIBN (9.85 mg, 0.06 mmol) were homogenized in a rounded vial and then closed with a bimetal crimp cap with a PTFE/silicone septum. The mixture was purged with nitrogen in an ice-bath for 20 min and then placed in a pre-heated oil bath at 80 °C. After 18 hours the vessels were cooled to room temperature and opened. The reaction mixtures were dissolved in chloroform (1.5 mL) and then precipitated with hexane. The samples were then dissolved in  $\text{CDCl}_3$  to obtain  $^1\text{H}$  and  $^{13}\text{C}$  NMR spectra.

In the case of the copolymerization of O,S-BMDO with acrylamide (MP: 84.5 °C), the monomers and initiator were placed in a rounded vial with a bimetal crimp cap with a PTFE/silicone septum and dissolved in tetrahydrofuran (1 mL) under nitrogen. The solution was purged with nitrogen for 20 min. Then, the solvent was removed under reduced pressure at 20 °C and the thick mixture placed in a pre-heated oil bath at 80 °C. The reaction mixture

was then dissolved in acetone (1.5 mL) and precipitated in hexane. The sample was then dissolved in DMDO-*6d* to measure  $^1\text{H}$  NMR.

In the case of the conversion studies: monomer(s) and initiator were homogenized in a rounded vial closed with a bimetal crimp cap with a PTFE/silicone septum and purged with nitrogen in an ice-bath for 20 minutes. Then, the mixture was distributed in equal portions to 6 to 8 vessels with bimetal crimp caps with PTFE/silicone septums under nitrogen. At various times during the polymerization the vessels were removed, put into ice, and then opened. The reaction mixtures were dissolved in  $\text{CDCl}_3$  to obtain  $^1\text{H}$  NMR spectra.

### 3.3 – Chemical degradation

Poly(Sty-*co-O,S*-BMDO) or poly(*O,S*-BMDO) (35-38 mg) and KOH (45 mg, 17.8 mmol) were suspended in EtOH/H<sub>2</sub>O (4:1; 0.4 mL) and stirred under nitrogen at 80 °C for 18 h. The mixture was then diluted with H<sub>2</sub>O (3 mL) and acidified with 1M HCl to pH = ca. 6 followed by extraction with EtOAc. The organic fractions were dried over Na<sub>2</sub>SO<sub>4</sub>, filtered, and then concentrated.

Poly(Sty-*co-O,S*-BMDO) or poly(*O,S*-BMDO) (26-30 mg) were dissolved in TFA (1.0 mL). The mixture was stirred at room temperature for 5 h and then concentrated under reduced pressure.

Poly(Sty-*co-O,S*-BMDO) or poly(*O,S*-BMDO) (30 mg) were dissolved in chloroform (1 mL). Then, AlCl<sub>3</sub> was added (for poly(*O,S*-BMDO) = 44 mg of AlCl<sub>3</sub>); (for poly(Sty<sub>82.7</sub>-*co-O,S*-BMDO<sub>17.3</sub>) = 12 mg of AlCl<sub>3</sub>). The mixture was stirred at room temperature for 4h and then diluted with chloroform (5 mL) and filtered, followed by concentration under reduced pressure.



## 4. $^1\text{H}$ and $^{13}\text{C}$ NMR spectra

### 4.1 – Monomers & intermediates

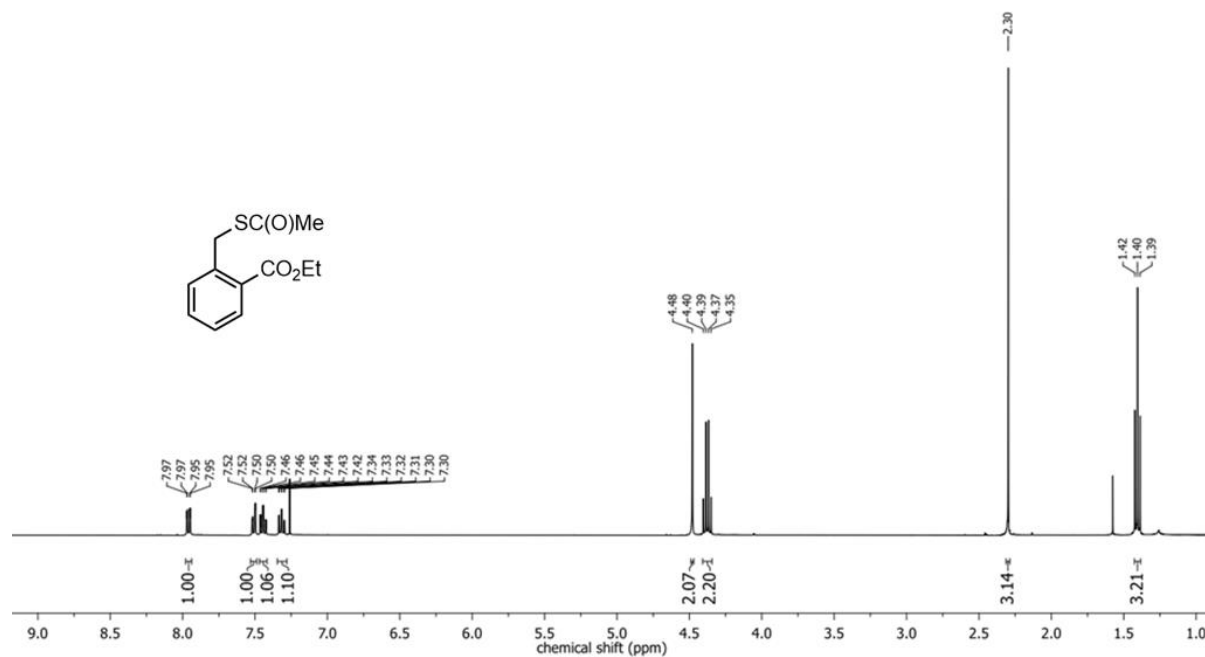

Figure S3.  $^1\text{H}$  NMR (CDCl<sub>3</sub>, 700 MHz) of ethyl 2-(acetylsulfanylmethyl)benzoate (5).

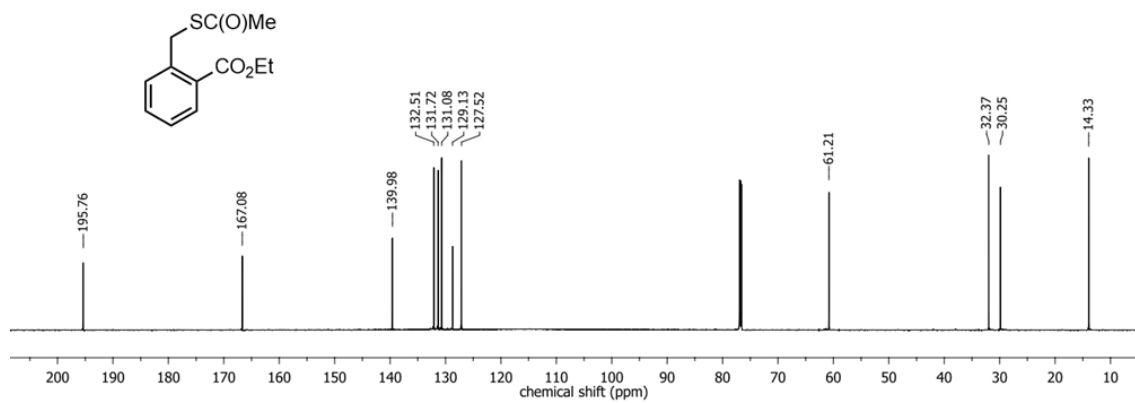

Figure S4.  $^{13}\text{C}$  NMR (CDCl<sub>3</sub>, 176 MHz) of ethyl 2-(acetylsulfanylmethyl)benzoate (5).

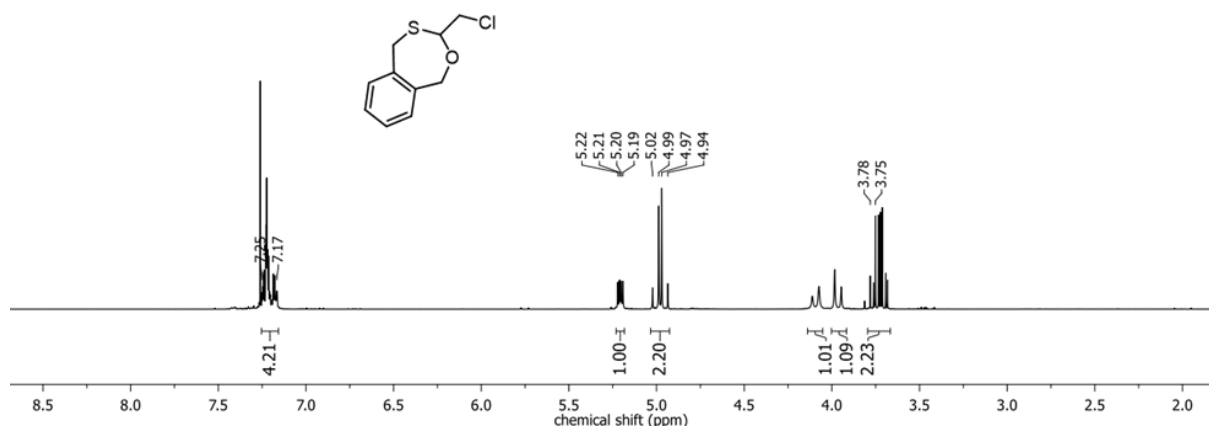

**Figure S5.**  $^1\text{H NMR}$  (CDCl<sub>3</sub>, 700 MHz) of 5,6-benzo-2-(chloromethyl)-1,3-oxthiepane (**7**).

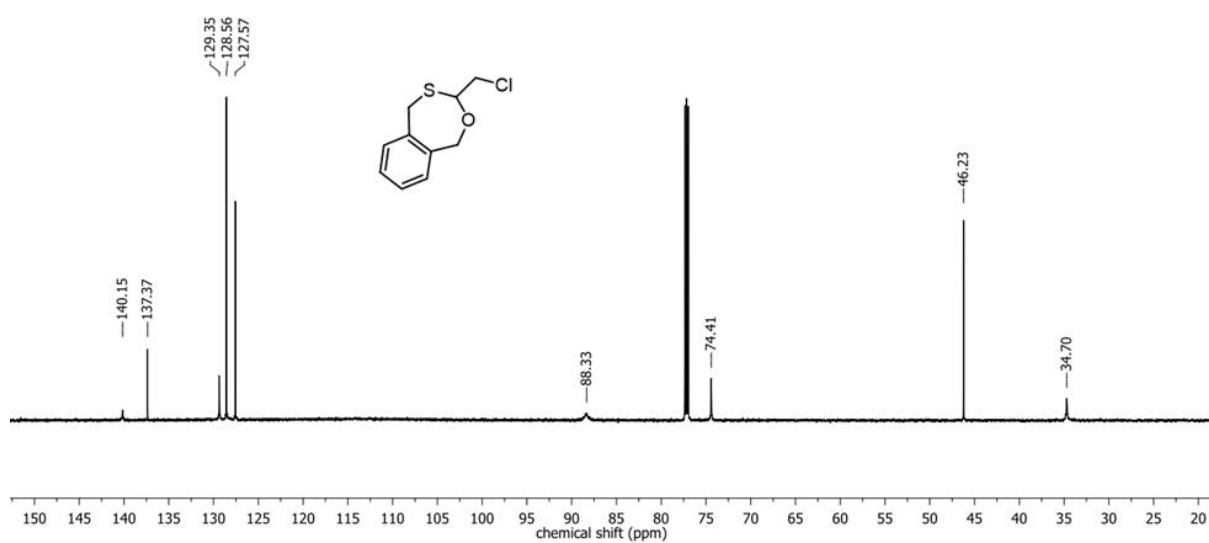

**Figure S6.**  $^{13}\text{C NMR}$  (CDCl<sub>3</sub>, 176 MHz) of 5,6-benzo-2-(chloromethyl)-1,3-oxthiepane (**7**).

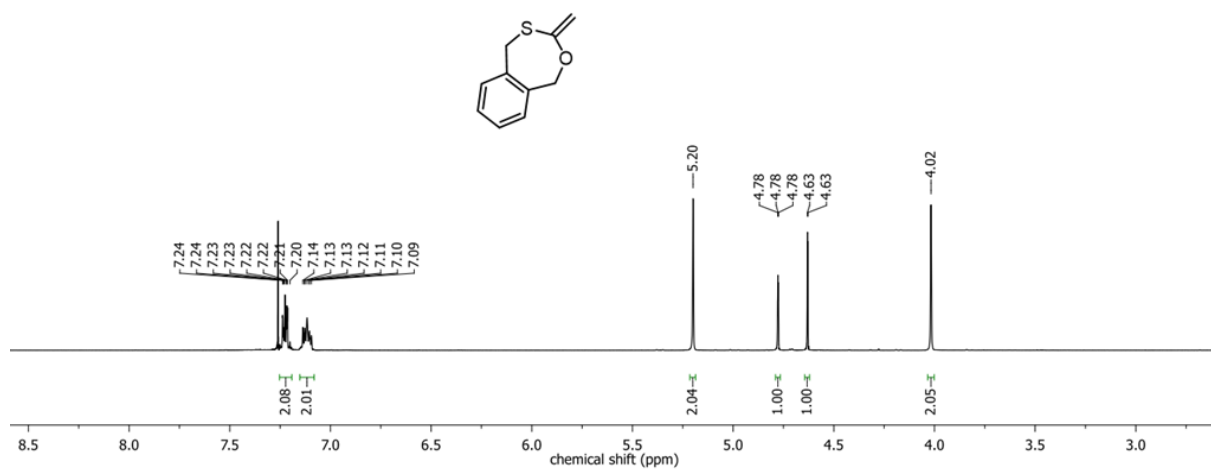

**Figure S7.** <sup>1</sup>H NMR (CDCl<sub>3</sub>, 700 MHz) of 5,6-benzo-2-methylene-1,3-oxthiepane (**8**).

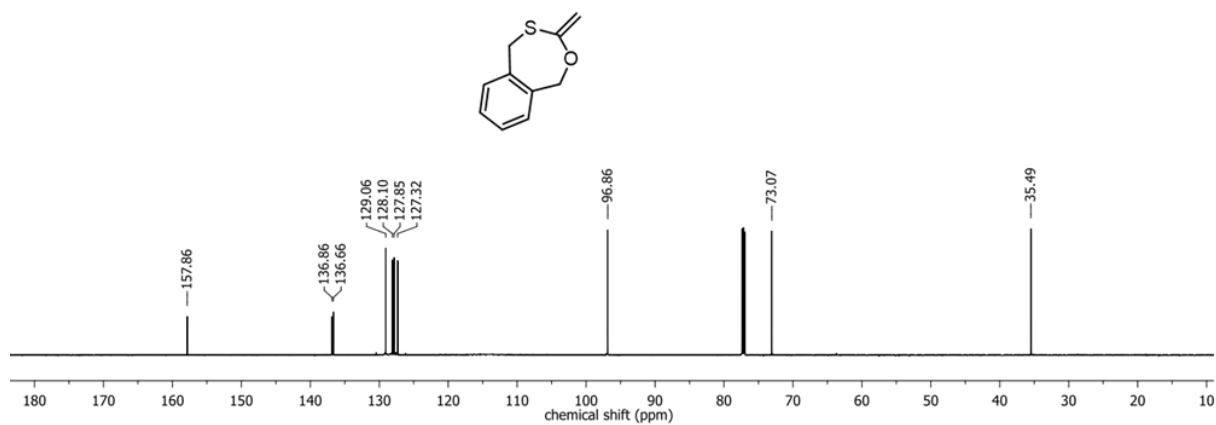

**Figure S8.** <sup>13</sup>C NMR (CDCl<sub>3</sub>, 176 MHz) of 5,6-benzo-2-methylene-1,3-oxthiepane (**8**).

## 4.2 – Polymers

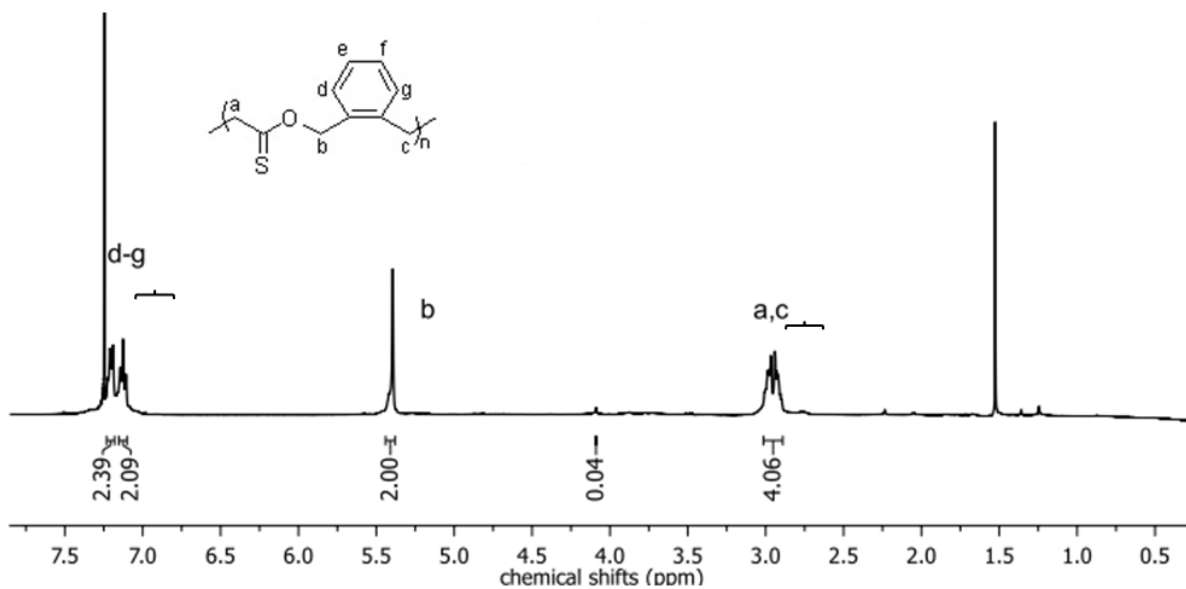

**Figure S9.**  $^1\text{H}$  NMR ( $\text{CDCl}_3$ , 700 MHz) of poly(*O,S*-BMDO).

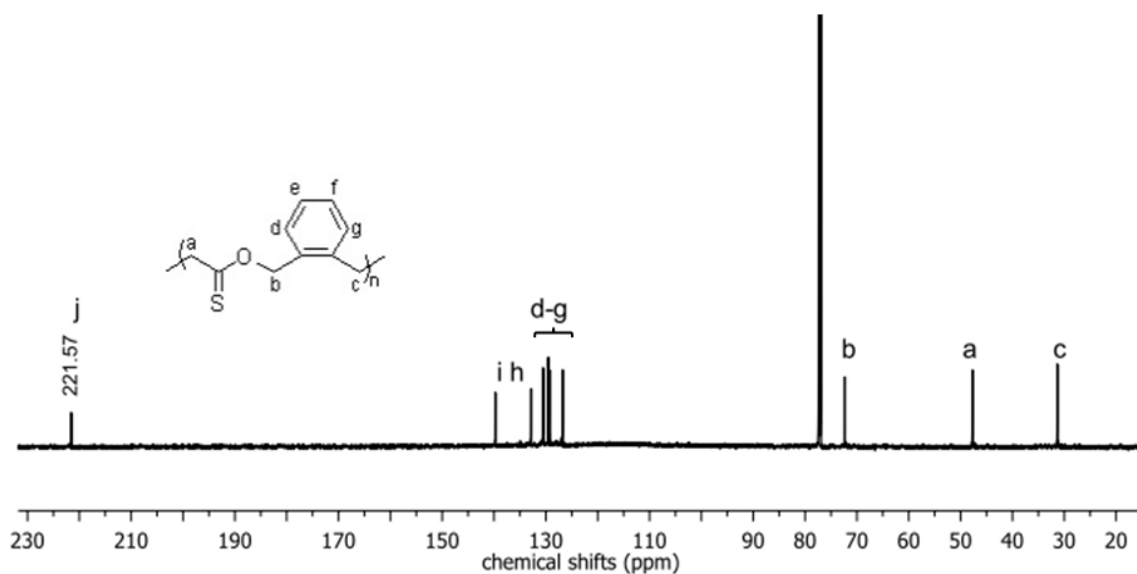

**Figure S10.**  $^{13}\text{C}$  NMR ( $\text{CDCl}_3$ , 176 MHz) of poly(*O,S*-BMDO).

### Poly(Sty<sub>59.5</sub>-co-O,S-BMDO<sub>40.5</sub>) – an example of almost exclusive S-side ring-opening

The copolymer composition was determined by taking the total peak areas of the aromatic protons of O,S-BMDO and the Sty units together ( $I_{Ar}$ ) and that of C(S)OCH<sub>2</sub> protons of O,S-BMDO at 5.0–5.5 ppm ( $I_{BMDO}$ ) using the following formula:

a:b = molar ratio of O,S-BMDO : molar ratio of Sty

$I_{BMDO} = 2a$ ,  $I_{Ar} = 4a + 5b$ , thus  $a = I_{BMDO}/2$  and  $b = (I_{Ar} - 2*I_{BMDO})/5$ .

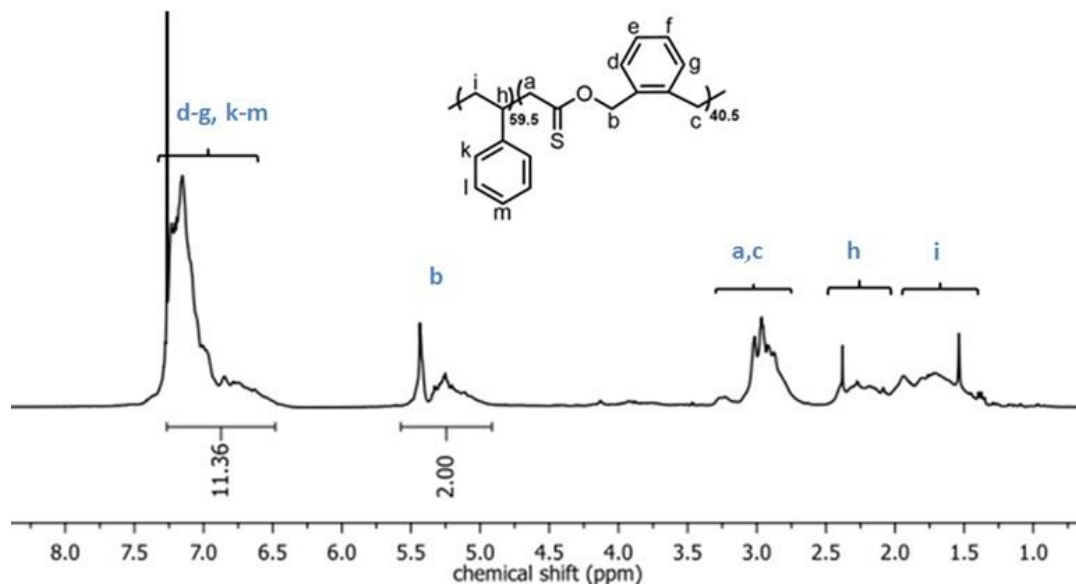

Figure S11. <sup>1</sup>H NMR (CDCl<sub>3</sub>, 700 MHz) of poly(Sty-co-O,S-BMDO)

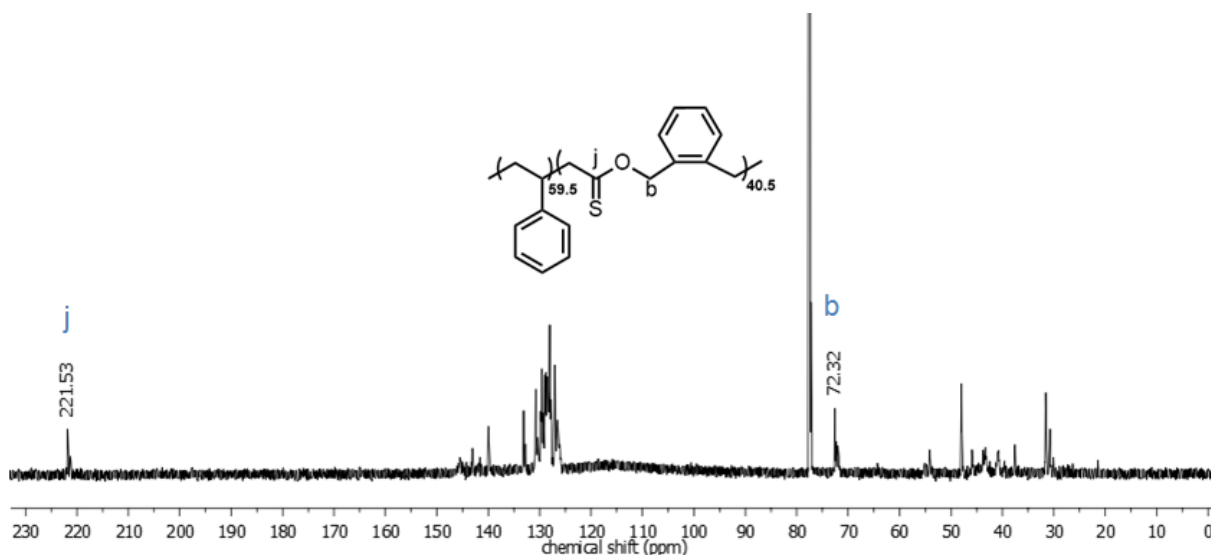

Figure S12. <sup>13</sup>C NMR (CDCl<sub>3</sub>, 176 MHz) of poly(Sty-co-O,S-BMDO).

### Poly(MMA<sub>48.5</sub>-co-O,S-BMDO<sub>51.5</sub>) – an example of mixed O-side and S-side ring-opening

Poly(MMA-co-O,S-BMDO) revealed similar complexity to that obtained for poly(MMA-co-BMDO), as analysed by Wickel *et al.* (Macromolecules 2003, 36, 2397-2403). Thus, for the previously published copolymer the methoxy group of the MMA was observed as four peaks at 3.4–3.8 ppm in all copolymer samples, in contrast to a single peak in the PMMA homopolymer. Similarly, the methyl group attached to carbon  $\alpha$  showed complex resonance signals at 0.83–1.33 ppm. As stated by the authors, these signals have high chemical shift variation due to the presence of compositional and tacticity effects. Furthermore, many overlapping resonance signals in the region 1.48–3.0 ppm were assigned to BMDO and MMA-main chain protons.

After careful analysis of samples of poly(MMA-co-O,S-BMDO) with different compositions, *ca.* 5 peaks at 3.25–3.75 ppm were assigned to the methoxy group of MMA. The copolymer composition was then determined by taking the sum of the C(S)OCH<sub>2</sub> protons and C(O)SCH<sub>2</sub> protons of O,S-BMDO at 5.25–5.55 ppm and at 4.0–4.2 ppm (*I*<sub>BMDO</sub>), respectively, and the sum of O–CH<sub>3</sub> protons at 3.25–3.75 ppm (*I*<sub>MMA</sub>) and applying the following formula:

*a*:*b* = molar ratio of O,S-BMDO : molar ratio of MMA.

*I*<sub>BMDO</sub> = 2*a*, *I*<sub>MMA</sub> = 3*b*, thus  $a = I_{\text{BMDO}}/2$  and  $b = I_{\text{MMA}}/3$ .

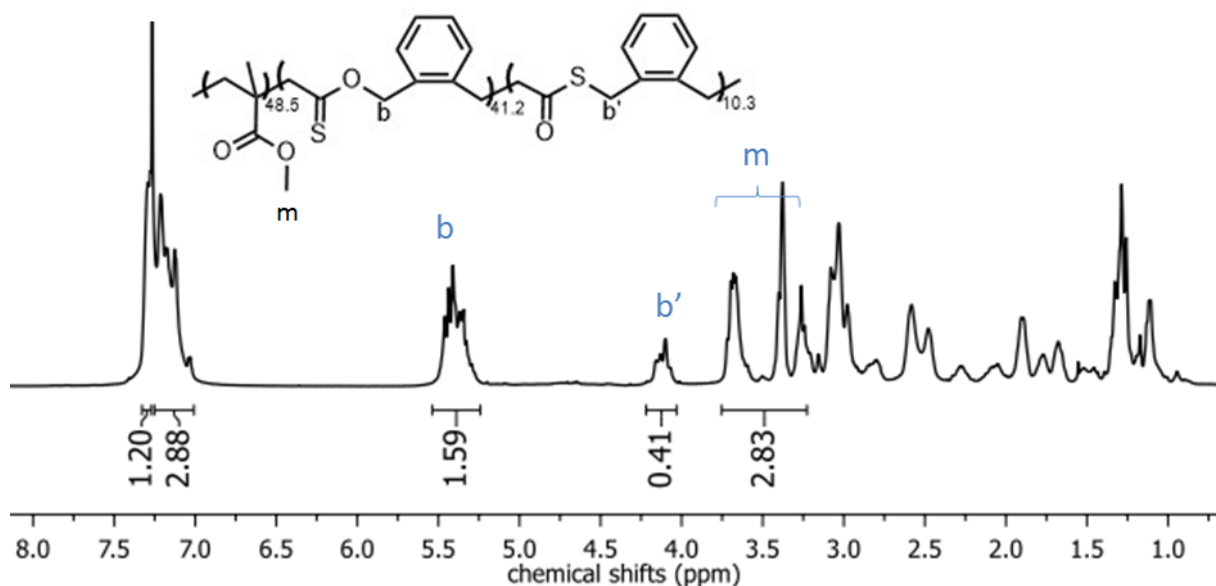

**Figure S13.** <sup>1</sup>H NMR (CDCl<sub>3</sub>, 700 MHz) of poly(MMA-co-O,S-BMDO).

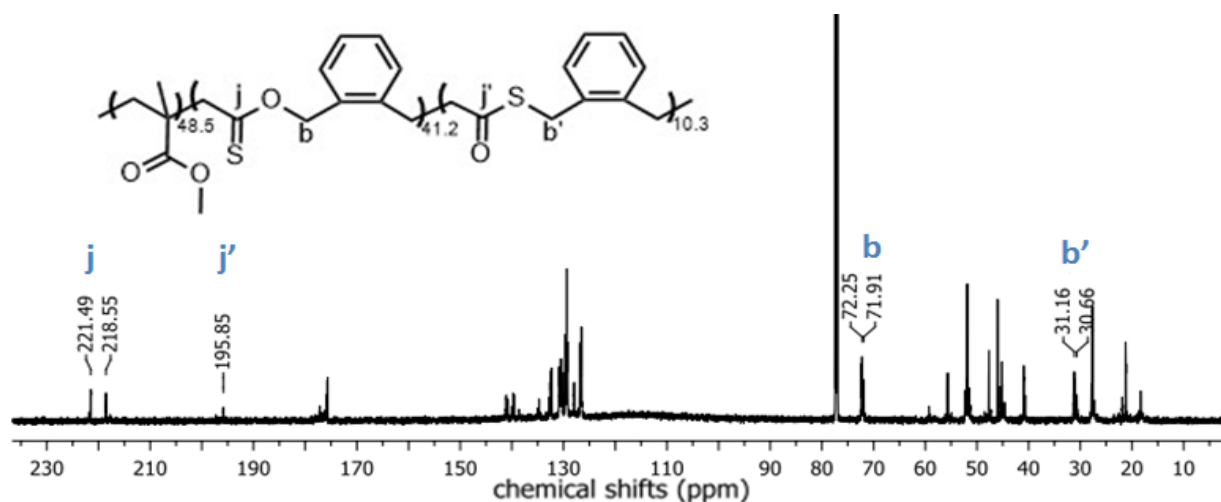

**Figure S14.**  $^{13}\text{C}$  NMR ( $\text{CDCl}_3$ , 176 MHz) of poly(MMA-*co*-O,S-BMDO).

**Poly(DMAA<sub>57.4</sub>-*co*-O,S-BMDO<sub>42.6</sub>) – an example of almost exclusive O-side ring opening**

The copolymer composition was determined by taking the sum of the C(S)OCH<sub>2</sub> protons and C(O)SCH<sub>2</sub> protons of O,S-BMDO at 5.4–5.5 ppm and at 4.0–4.25 ppm (= I<sub>BMDO</sub>), respectively, and the sum of all protons at ca. 1.5–2.00 ppm and ca. 2.5–3.30 ppm – 2\*I<sub>BMDO</sub> (= I<sub>DMAA</sub>) and using the following formula:

a:b = molar ratio of O,S-BMDO : molar ratio of DMAA.

I<sub>BMDO</sub> = 2a, I<sub>DMAA</sub> = 9b, thus  $a = I_{\text{BMDO}}/2$  and  $b = I_{\text{DMAA}}/9$ .

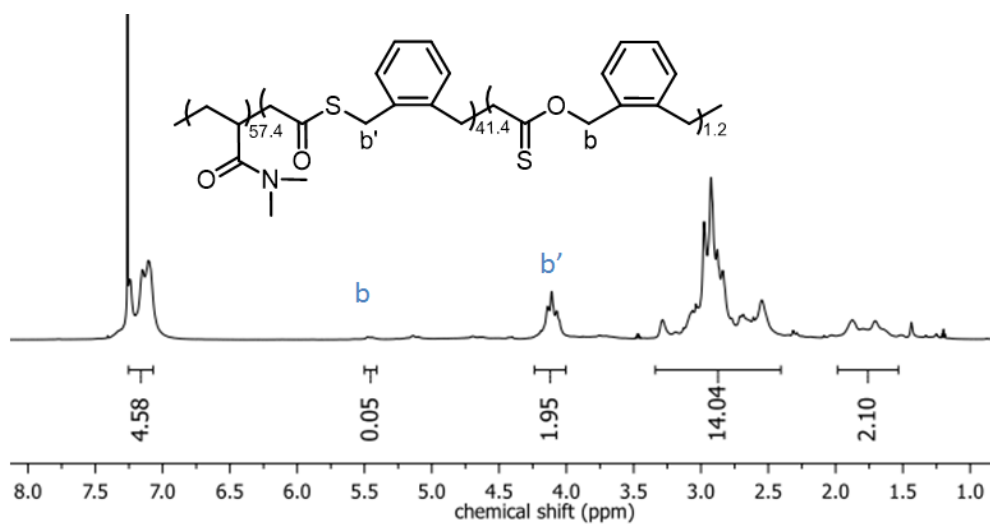

**Figure S15.**  $^1\text{H}$  NMR ( $\text{CDCl}_3$ , 700 MHz) of poly(DMAA-*co*-O,S-BMDO).

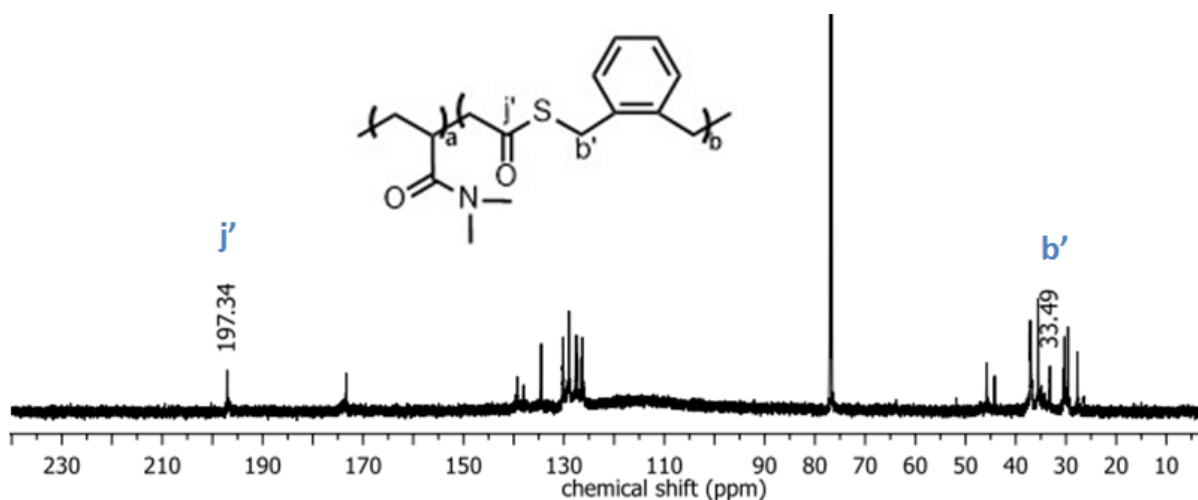

**Figure S16.**  $^{13}\text{C}$  NMR ( $\text{CDCl}_3$ , 176 MHz) of poly(DMAA-co-O,S-BMDO).

**Poly(MA<sub>55.7</sub>-co-O,S-BMDO<sub>44.3</sub>) ( $^1\text{H}$  NMR) and poly(MA<sub>30.0</sub>-co-O,S-BMDO<sub>70.0</sub>) ( $^{13}\text{C}$  NMR)**

The copolymer composition was determined by taking the sum of the  $\text{C}(\text{S})\text{OCH}_2$  protons and  $\text{C}(\text{O})\text{SCH}_2$  protons of O,S-BMDO at 5.35–5.50 ppm and at 4.05–4.15 ppm ( $I_{\text{BMDO}}$ ), respectively, and the integration of  $\text{O}-\text{CH}_3$  protons at 3.45–3.70 ppm ( $I_{\text{MA}}$ ) and applying the following formula:

a:b = molar ratio of O,S-BMDO : molar ratio of MA.

$I_{\text{BMDO}} = 2a$ ,  $I_{\text{MA}} = 3b$ , thus  $a = I_{\text{BMDO}}/2$  and  $b = I_{\text{MA}}/3$ .

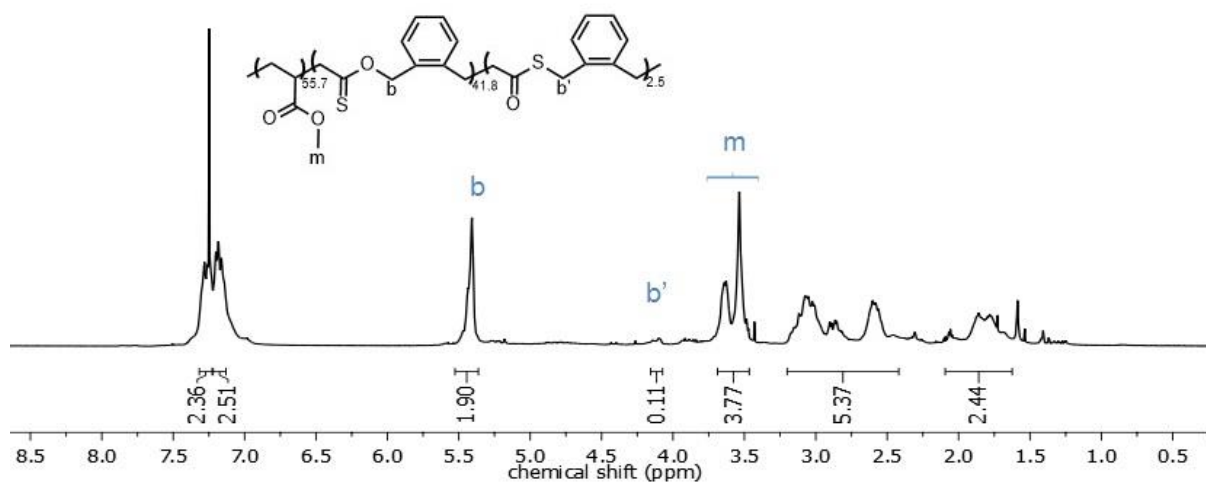

**Figure S17.**  $^1\text{H}$  NMR ( $\text{CDCl}_3$ , 700 MHz) of poly(MA-co-O,S-BMDO).



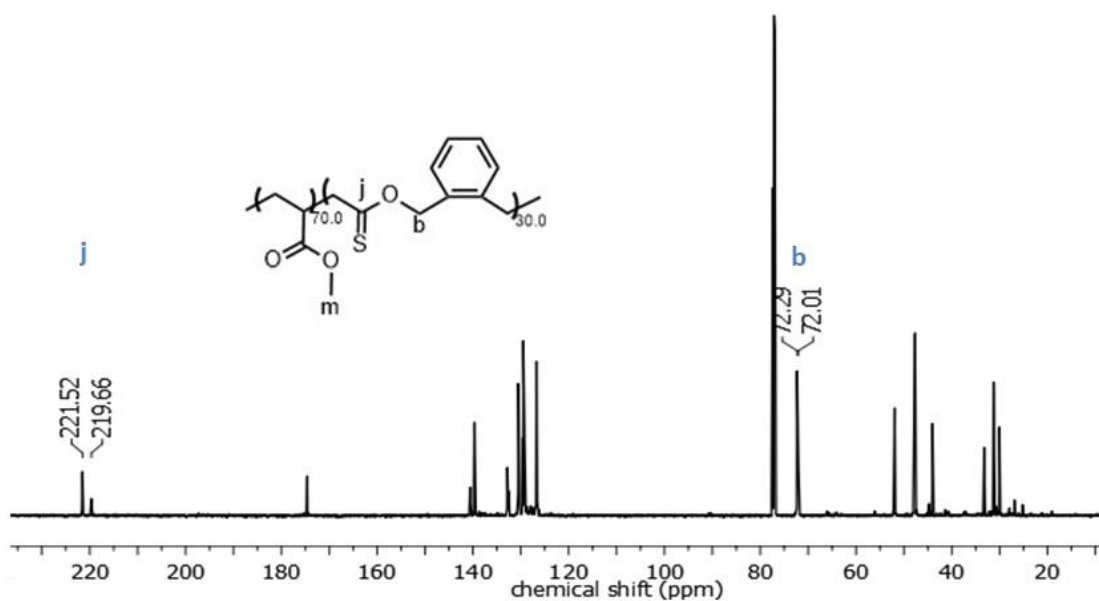

**Figure S18.**  $^{13}\text{C}$  NMR ( $\text{CDCl}_3$ , 176 MHz) of poly(MA-*co*-O,S-BMDO).

### Poly(AAc<sub>36.7</sub>-*co*-O,S-BMDO<sub>63.3</sub>)

The copolymer composition was determined by taking the sum of the C(S)OCH<sub>2</sub> protons and C(O)SCH<sub>2</sub> protons of O,S-BMDO at 5.40–5.55 ppm and at 4.10–4.20 ppm (*I*<sub>BMDO</sub>), respectively, and the integration of C(O)CH<sub>3</sub> protons at 2.0–2.10 ppm (*I*<sub>AAc</sub>) and applying the following formula:

a:b = molar ratio of O,S-BMDO : molar ratio of AAc.

*I*<sub>BMDO</sub> = 2a, *I*<sub>AAc</sub> = 3b, thus  $a = I_{\text{BMDO}}/2$  and  $b = (I_{\text{AAc}}/3)$ .

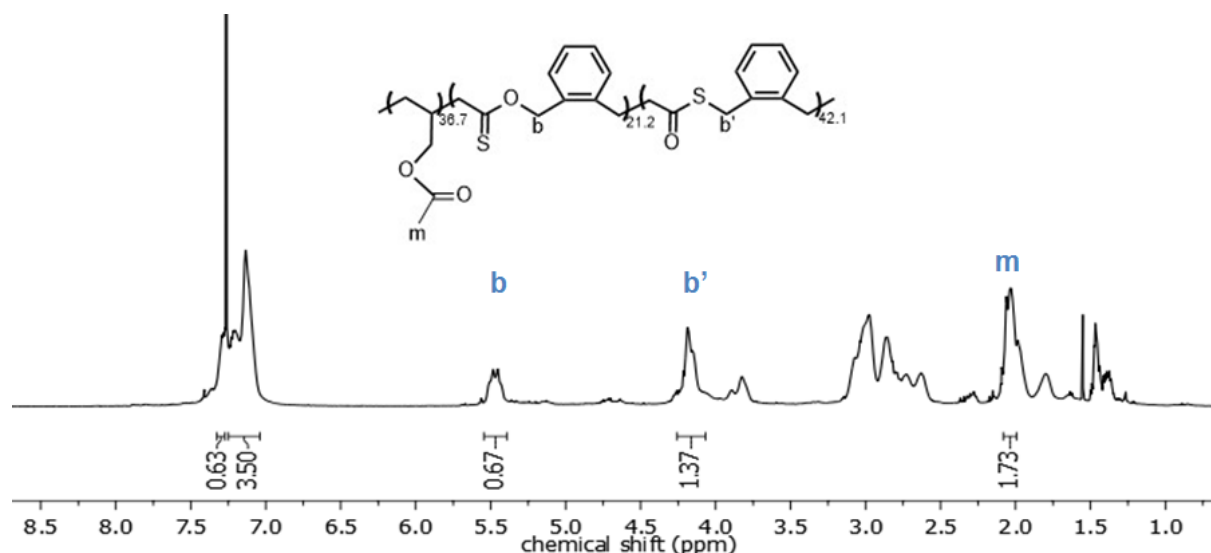

**Figure S19.**  $^1\text{H}$  NMR ( $\text{CDCl}_3$ , 700 MHz) of poly(AAc-*co*-O,S-BMDO).

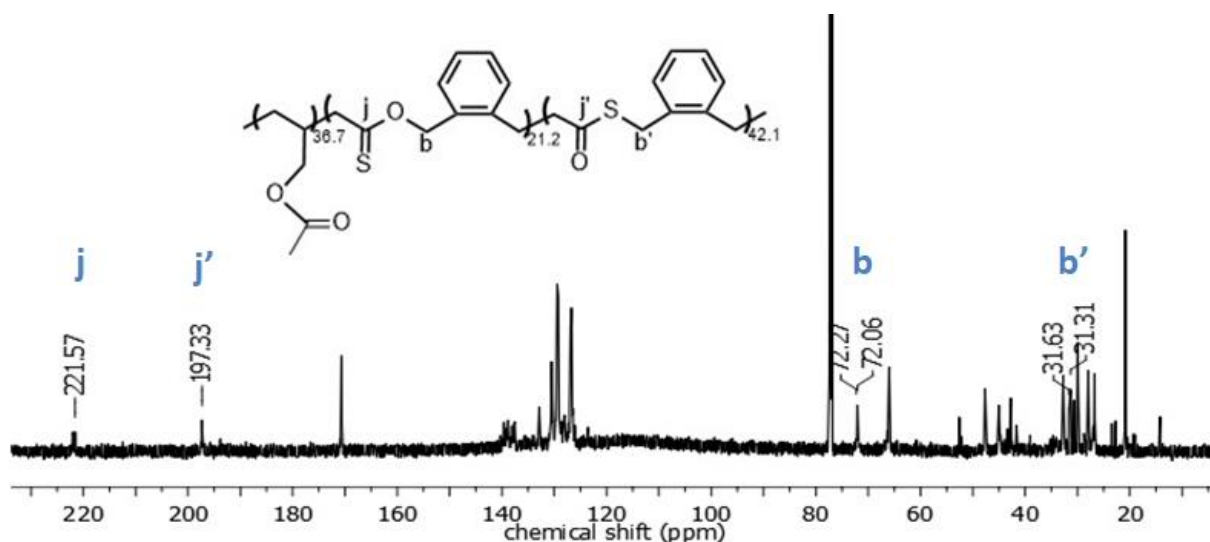

**Figure S20.**  $^{13}\text{C}$  NMR ( $\text{CDCl}_3$ , 176 MHz) of poly(AAc-*co*-O,S-BMDO).

**Poly(VAc<sub>22.3</sub>-*co*-O,S-BMDO<sub>77.7</sub>)**

The copolymer composition was determined by taking the sum of integrations of the C(S)OCH<sub>2</sub> protons and C(O)SCH<sub>2</sub> protons of O,S-BMDO at 5.35–5.55 ppm and at 4.10–4.25 ppm (*I*<sub>BMDO</sub>), respectively, and the integration of C(O)CH<sub>3</sub> protons at 1.95–2.10 ppm (*I*<sub>VAc</sub>) and applying the following formula:

a:b = molar ratio of O,S-BMDO : molar ratio of VAc.

*I*<sub>BMDO</sub> = 2a, *I*<sub>VAc</sub> = 3b, thus  $a = I_{\text{BMDO}}/2$  and  $b = (I_{\text{VAc}}/3)$ .

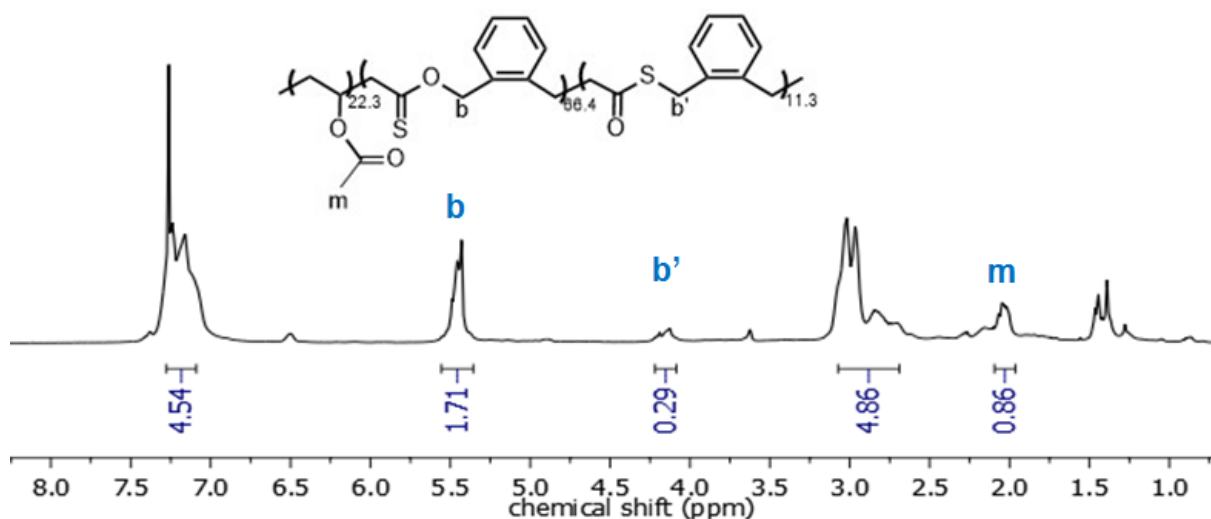

**Figure S21.**  $^1\text{H}$  NMR ( $\text{CDCl}_3$ , 700 MHz) of poly(VAc-*co*-O,S-BMDO).

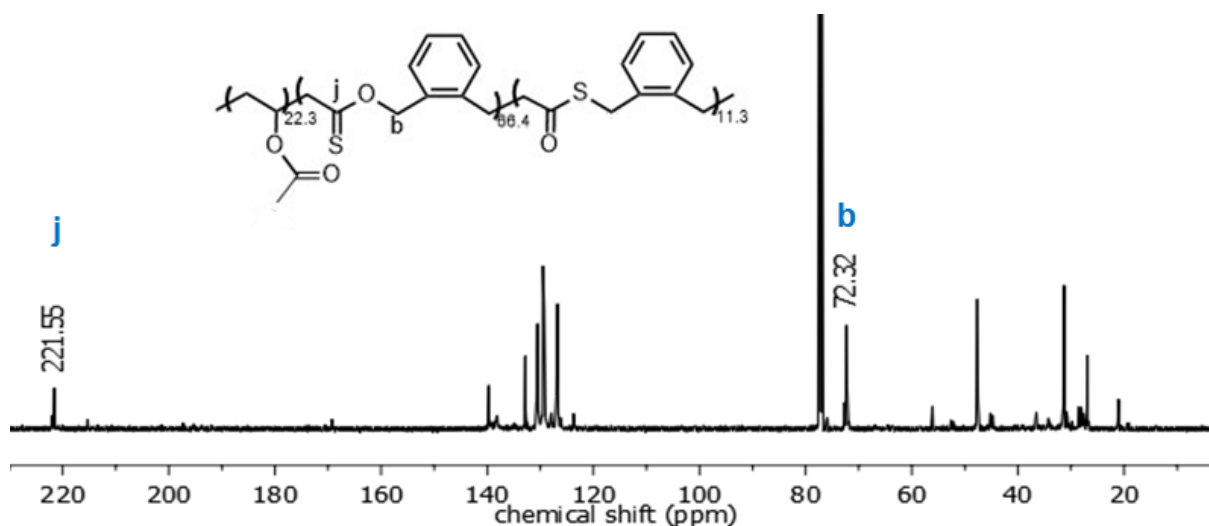

**Figure S22.**  $^{13}\text{C}$  NMR ( $\text{CDCl}_3$ , 176 MHz) of poly(VAc-co-O,S-BMDO).

**Poly(AM<sub>88.6</sub>-co-O,S-BMDO<sub>11.4</sub>)**

The copolymer composition was then determined by taking the sum of the  $\text{C}(\text{S})\text{OCH}_2$  protons and  $\text{C}(\text{O})\text{SCH}_2$  protons of O,S-BMDO at 5.40–5.50 ppm and at 4.00–4.10 ppm ( $I_{\text{BMDO}}$ ), respectively, and the integration of  $\text{CHC}(\text{O})\text{NH}_2$  protons at 2.05–2.25 ppm ( $I_{\text{AM}}$ ) and applying the following formula:

$a:b$  = molar ratio of O,S-BMDO : molar ratio of AM.

$I_{\text{BMDO}} = 2a$ ,  $I_{\text{AM}} = b$ , thus  $a = I_{\text{BMDO}}/2$ .

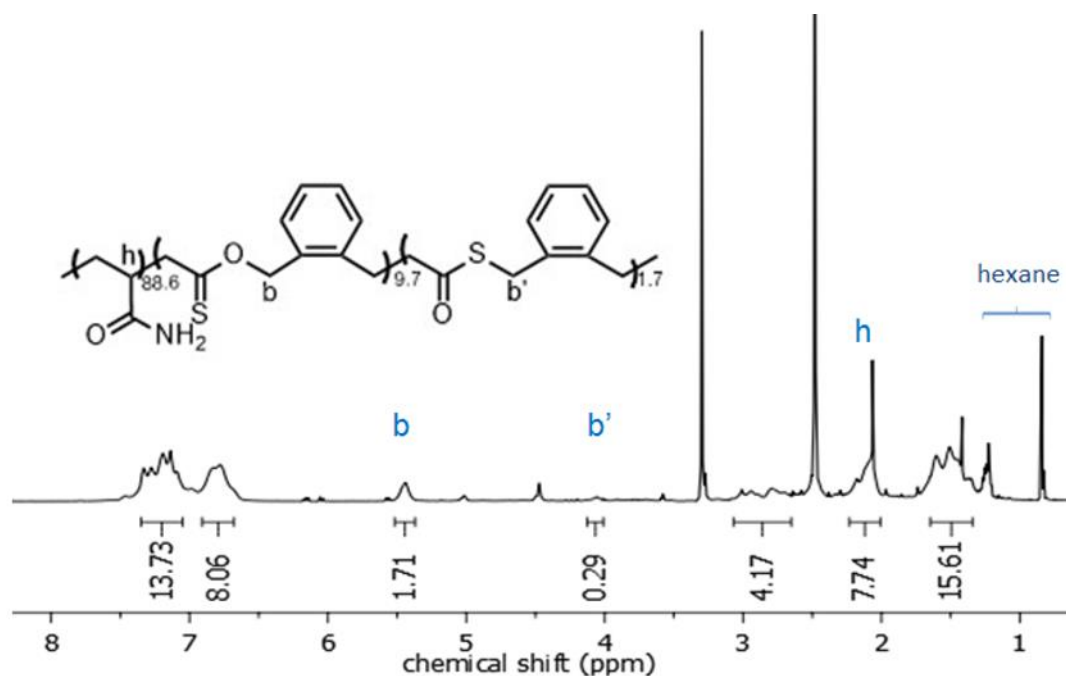

**Figure S23.**  $^1\text{H}$  NMR ( $\text{DMSO-d}_6$ , 700 MHz) of poly(AM-co-O,S-BMDO).

## 5. GPC of Styrene and *O,S*-BMDO copolymers

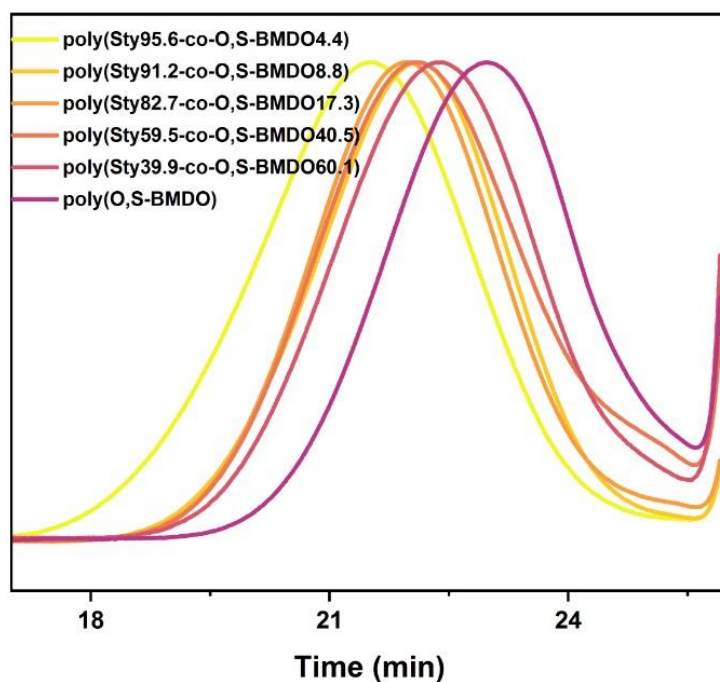

**Figure S24.** GPC traces of different compositions of polymers obtained from styrene/*O,S*-BMDO, and the homopolymer of *O,S*-BMDO. In most cases, the  $M_n$  decreased with increased *O,S*-BMDO (**8**) in the feed.

| Copolymer                                                        | $M_n$ (kg/mol) | $\bar{D}$ |
|------------------------------------------------------------------|----------------|-----------|
| poly(Sty <sub>95.6</sub> -co- <i>O,S</i> -BMDO <sub>4.4</sub> )  | 12.2           | 2.4       |
| poly(Sty <sub>91.2</sub> -co- <i>O,S</i> -BMDO <sub>8.8</sub> )  | 8.54           | 2.1       |
| poly(Sty <sub>82.7</sub> -co- <i>O,S</i> -BMDO <sub>17.3</sub> ) | 8.76           | 2.1       |
| poly(Sty <sub>59.5</sub> -co- <i>O,S</i> -BMDO <sub>40.5</sub> ) | 6.53           | 2.5       |
| poly(Sty <sub>39.1</sub> -co- <i>O,S</i> -BMDO <sub>60.9</sub> ) | 5.97           | 2.5       |
| poly( <i>O,S</i> -BMDO)                                          | 3.62           | 2.6       |

**Table S1.** SEC results for copolymers of Sty/*O,S*-BMDO, and poly(*O,S*-BMDO).

## 6. Conversion

Conversion of styrene in the homopolymerization, as well as the conversion of styrene and *O,S*-BMDO (**8**) in the copolymerization, were calculated based on  $^1\text{H}$  NMR.

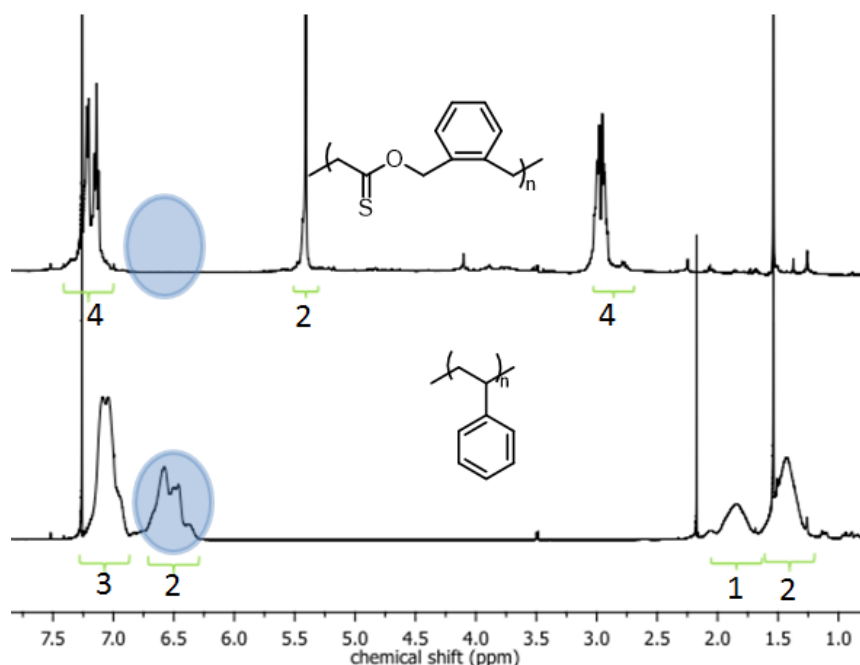

**Figure S25.**  $^1\text{H}$  NMR spectra of poly(*O,S*-BMDO) and polystyrene with highlighted aromatic signals. For polystyrene, in the region at ca. 6.25–6.75 ppm the integration of the multiplet = 2.0. This region is empty in the  $^1\text{H}$  NMR of *O,S*-BMDO and poly(*O,S*-BMDO). Therefore, these signals were used to calculate the amount of styrene monomer that underwent polymerization.

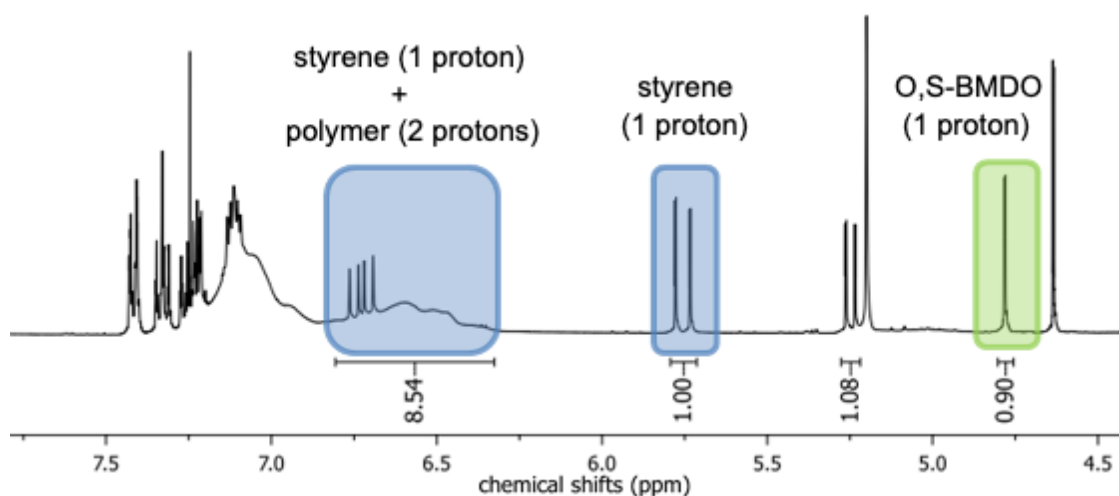

**Figure S26.** Example of  $^1\text{H}$  NMR taken to determine the conversion of the monomers in the copolymerization (75 min).

| Time (min) | Homopolymerization    | Copolymerization                       |                                                  |                      |
|------------|-----------------------|----------------------------------------|--------------------------------------------------|----------------------|
|            | Conversion of Sty (%) | Conversion of Sty (%) ( $Sty_{conv}$ ) | Conversion of O,S-BMDO (%) ( $O,S-BMDO_{conv}$ ) | Total Conversion (%) |
| 0          | 0                     | 0                                      | 0                                                | 0.0                  |
| 15         | 12.5                  | 15.2                                   | 5.1                                              | 13.2                 |
| 30         | 34.9                  | 29.9                                   | 10.2                                             | 25.9                 |
| 45         | 56.2                  | 63.9                                   | 13.5                                             | 53.9                 |
| 60         | 68.9                  | 71.1                                   | 16.8                                             | 60.2                 |
| 75         | 77.2                  | 79.0                                   | 24.5                                             | 68.1                 |
| 90         | 90.0                  | 91.8                                   | 32.0                                             | 79.8                 |
| 105        | -                     | 92.5                                   | 37.6                                             | 81.6                 |
| 120        | -                     | 93.1                                   | 43.4                                             | 83.2                 |

**Table S2.** Conversion of styrene in the homopolymerization as well as conversion of styrene and O,S-BMDO (**8**) in copolymerization calculated based on  $^1H$  NMR. Total conversion =  $a(Sty_{conv.}) + b(O,S-BMDO_{conv.})$  where  $a$  and  $b$  are the fractional composition of monomers (0.8 and 0.2 respectively).

## 7. Reactivity Ratio (Fineman-Ross, Kelen-Tüdös and Mayo-Lewis Methods)

In the Fineman-Ross method, G was plotted against H for each experiment yielding a straight line with slope  $r_1$  and intercept  $r_2$ . The G and H were calculated based on equations listed below (1-3). F refers to monomer feed, and f to copolymer composition:

$$G = r_1 H - r_2 \quad (1)$$

$$G = \frac{F_1}{F_2} \left( 1 - \frac{f_2}{f_1} \right) \quad (2)$$

$$H = \left( \frac{F_1}{F_2} \right)^2 \left( \frac{f_2}{f_1} \right) \quad (3)$$

| Entry | F <sub>1</sub> | F <sub>2</sub> | f <sub>1</sub> | f <sub>2</sub> | H    | G     | r <sub>1</sub> | r <sub>2</sub> |
|-------|----------------|----------------|----------------|----------------|------|-------|----------------|----------------|
| 1     | 10             | 90             | 4.4            | 95.6           | 0.27 | -2.30 | 0.96±0.17      | 2.52±0.32      |
| 2     | 20             | 80             | 8.8            | 91.2           | 0.65 | -2.34 |                |                |
| 3     | 30             | 70             | 17.3           | 82.7           | 0.88 | -1.62 |                |                |
| 4     | 50             | 50             | 40.5           | 59.5           | 1.47 | -0.47 |                |                |
| 5     | 70             | 30             | 60.1           | 39.9           | 3.61 | 0.78  |                |                |

**Table S3.** Finemann-Ross method: F<sub>1</sub>, f<sub>1</sub> and r<sub>1</sub> refers to O,S-BMDO and F<sub>2</sub>, f<sub>2</sub> and r<sub>2</sub> refers to styrene.

Intercept -2,51573 ± 0,31593

Slope 0,96395 ± 0,17399

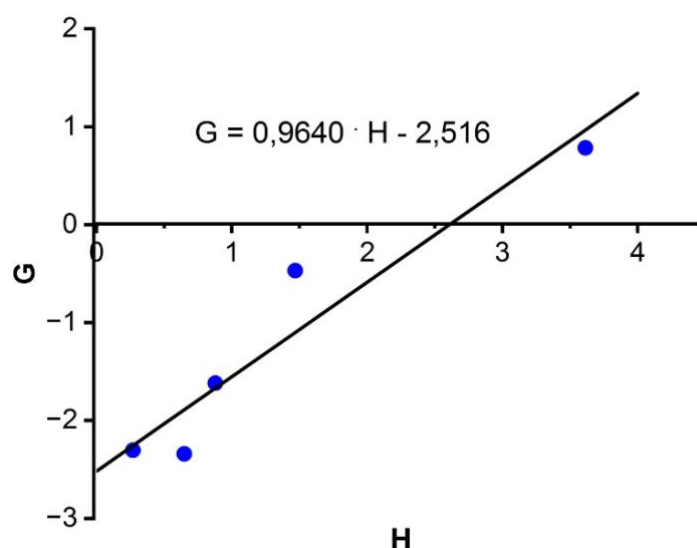

**Figure S27.** The Fineman-Ross plot for poly(Sty-co-O,S-BMDO).

In the Kelen-Tüdös method, arbitrary constant ( $\alpha$ ) is introduced. The previously defined values, G and H are modified, giving values  $\xi$  and  $\eta$  where  $r_1$  and  $r_2$  are the reactivity ratios of styrene and O,S-BMDO and G and H are variables defined from the Fineman-Ross technique.  $H_{\min}$  and  $H_{\max}$  are the minimum and maximum values of H determined from the data. Reactivity ratios  $r_1$  and  $r_2$  can be calculated by plotting  $\xi$  versus  $\eta$  for each experiment. See equation, table, and plot below:

$$\eta = \left( \frac{r_1+r_2}{\alpha} \right) \xi - \frac{r_2}{\alpha} \quad (4)$$

$$\eta = \frac{G}{\alpha+H} \quad (5)$$

$$\xi = \frac{H}{\alpha+H} \quad (6)$$

$$\alpha = (H_{\min}H_{\max})^{\frac{1}{2}} \quad (7)$$

| Entry | F1 | F2 | f1   | f2   | $\alpha$ | $\xi$ | $\eta$ | $r_1$     | $r_2$     |
|-------|----|----|------|------|----------|-------|--------|-----------|-----------|
| 1     | 10 | 90 | 4.4  | 95.6 | 0.970    | 0.214 | -1.84  | 1.09±0.23 | 2.67±0.25 |
| 2     | 20 | 80 | 8.8  | 91.2 |          | 0.397 | -1.43  |           |           |
| 3     | 30 | 70 | 17.3 | 82.7 |          | 0.471 | -0.87  |           |           |
| 4     | 50 | 50 | 40.5 | 59.5 |          | 0.599 | -0.191 |           |           |
| 5     | 70 | 30 | 60.1 | 39.9 |          | 0.786 | 0.171  |           |           |

**Table S4.** Kelen-Tüdös method: F<sub>1</sub>, f<sub>1</sub> and r<sub>1</sub> refers to O,S-BMDO and F<sub>2</sub>, f<sub>2</sub> and r<sub>2</sub> refers to styrene.

Intercept -2,70663 ± 0,25672

Slope 3,7985 ± 0,48489

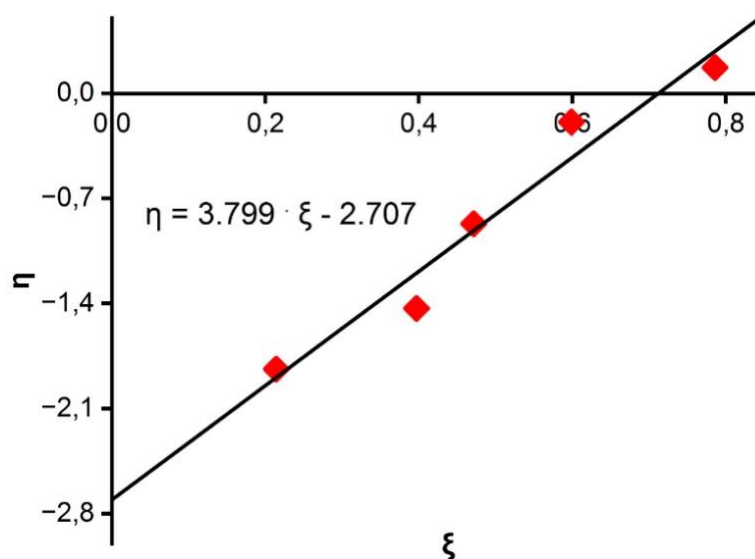

**Figure S28.** The Kelen-Tüdös plot for poly(Sty-co-O,S-BMDO).



The Mayo-Lewis method calculations were based on the equation:

$$r_2 = \frac{F_1}{F_2} \left[ \frac{f_2}{f_1} \left( 1 + \frac{F_1 r_1}{F_2} \right) - 1 \right] \quad (8)$$

For each different monomer composition, a line was generated using arbitrary  $r_1$  and  $r_2$  values. Then the point where the most lines were intersecting (entry 1, 3 and 5)  $r_1$  and  $r_2$  for the system was defined. See table and graph below:

| Entry | $F_1$ | $F_2$ | $f_1$ | $f_2$ | $r_2 = ar_1 + b$ calculated from equation (8) | $r_1$      | $r_2$    |
|-------|-------|-------|-------|-------|-----------------------------------------------|------------|----------|
| 1     | 10    | 90    | 4.4   | 95.6  | $r_2 = 0.268 r_1 + 2.30$                      | 0.99 ±0.11 | 2.50±0.1 |
| 2     | 20    | 80    | 8.8   | 91.2  | $r_2 = 0.6475 r_1 + 2.34$                     |            |          |
| 3     | 30    | 70    | 17.3  | 82.7  | $r_2 = 0.880 r_1 + 1.62$                      |            |          |
| 4     | 50    | 50    | 40.5  | 59.5  | $r_2 = 1.469 r_1 + 0.469$                     |            |          |
| 5     | 70    | 30    | 60.1  | 39.9  | $r_2 = 3.613 r_1 - 0.784$                     |            |          |

**Table S5.** Mayo-Lewis method:  $F_1$ ,  $f_1$  and  $r_1$  refers to O,S-BMDO and  $F_2$ ,  $f_2$  and  $r_2$  refers to styrene.

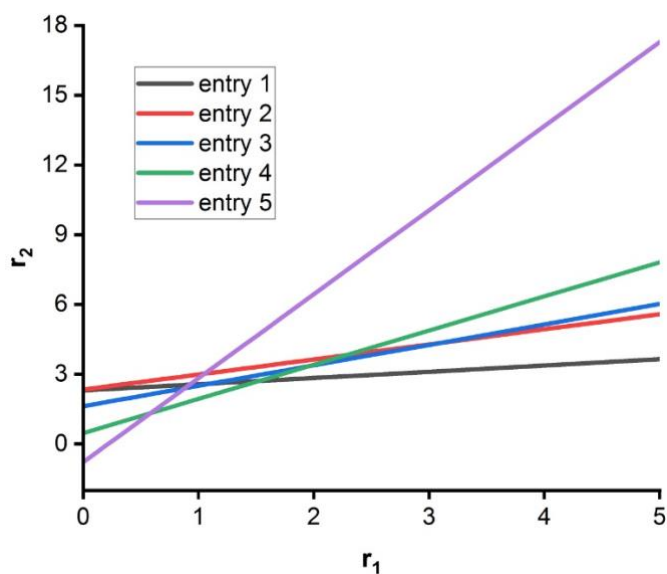

**Figure S29.** Line generated in Mayo-Lewis method for poly(Sty-co-O,S-BMDO)s.

## 8. Degradation

### Degradation of poly(*O,S*-BMDO) – KOH.

Degradation was performed by the addition of 2M KOH in EtOH/H<sub>2</sub>O (4:1) at 80 °C for 18 h followed by dilution with water and lowering the pH value to ca. 6 by the dropwise addition of 1M HCl, followed by extraction with EtOAc.

**Main product:**

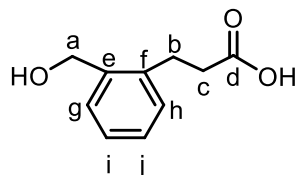

A

**Other products:**

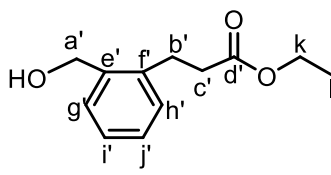

B

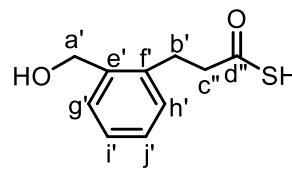

C

**Figure S30.** Structural formulas of the putative products of alkaline hydrolysis.

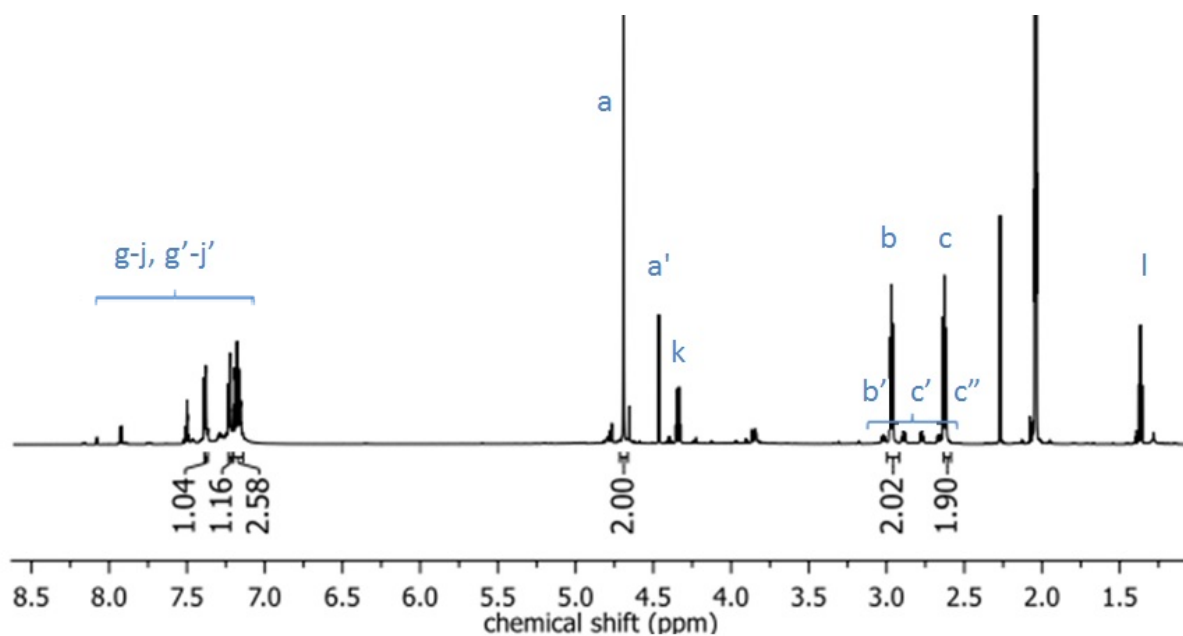

**Figure S31.** <sup>1</sup>H NMR (acetone-*d*<sub>6</sub>, 700 MHz) of poly(*O,S*-BMDO) after alkaline hydrolysis.

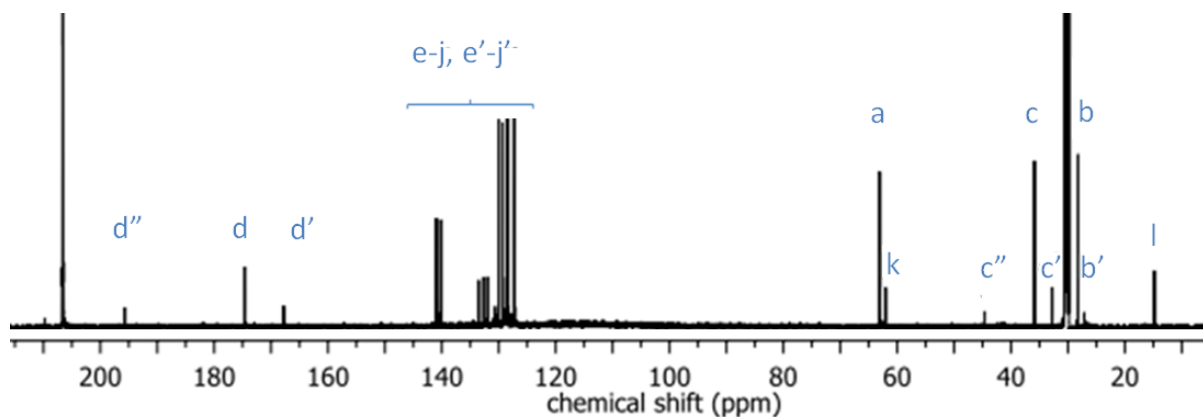

**Figure S32.** <sup>13</sup>C NMR (CDCl<sub>3</sub>, 176 MHz) of poly(*O,S*-BMDO) after alkaline hydrolysis.

### Rearrangement and degradation of poly(Sty-co-O,S-BMDO) – AlCl<sub>3</sub>.

Reaction: AlCl<sub>3</sub> (2.0 eq in relation to –C(S)O-) in chloroform, rt, 4 h.

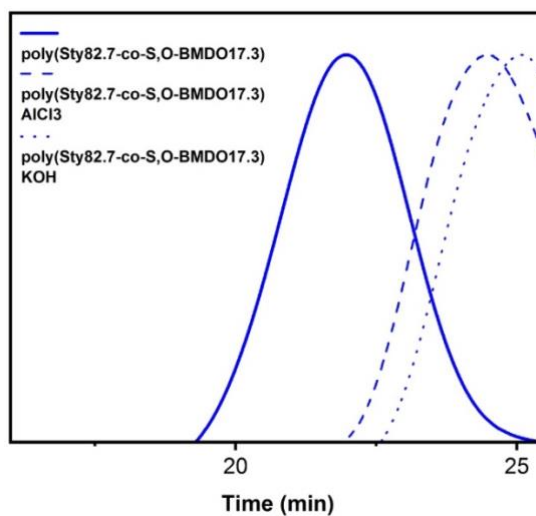

**Figure S33.** Changes in the GPC trace of poly(Sty<sub>82.7</sub>-co-O,S-BMDO<sub>17.3</sub>) after treatment with KOH or AlCl<sub>3</sub>.

| Polymer                                                                                      | <i>M<sub>n</sub></i> (kg/mol) <sup>a</sup> |
|----------------------------------------------------------------------------------------------|--------------------------------------------|
| poly(Sty <sub>82.7</sub> -co-O,S-BMDO <sub>17.3</sub> )                                      | 8.76                                       |
| poly(Sty <sub>82.7</sub> -co-O,S-BMDO <sub>17.3</sub> ) - AlCl <sub>3</sub> , chloroform, rt | <1.30 <sup>a</sup>                         |
| poly(Sty <sub>82.7</sub> -co-O,S-BMDO <sub>17.3</sub> ) – KOH, EtOH, H <sub>2</sub> O, 80 °C | <1.00 <sup>a</sup>                         |

**Table S6:** Molecular weights of the copolymer samples treated with AlCl<sub>3</sub>. <sup>a</sup> Difficult to accurately measure due to the overlapping of polymer and solvent signals.

## 9. Cartesian Coordinates and Energies (a.u.) of Stationary Points

---

R...M5

-1070.820381

|   |             |             |             |
|---|-------------|-------------|-------------|
| S | 0.09917400  | -0.16508600 | 1.93227800  |
| C | 0.87671200  | 1.05588700  | 0.82564900  |
| C | 1.34845900  | -1.77363400 | -0.29367800 |
| O | -0.00920400 | -1.33095900 | -0.45968200 |
| H | 1.04289500  | 1.95791600  | 1.43683900  |
| H | 0.12651100  | 1.31798000  | 0.05570800  |
| H | 1.43484000  | -2.33560900 | 0.65576500  |
| H | 1.52994700  | -2.48109200 | -1.12025400 |
| C | -0.71639100 | -1.11691800 | 0.68983100  |
| C | -1.97515600 | -1.56789800 | 0.81895700  |
| H | -2.40530400 | -2.22982000 | 0.06301900  |
| H | -2.59004000 | -1.25433600 | 1.66421100  |
| C | 2.38124300  | -0.66299800 | -0.35771500 |
| C | 2.18539100  | 0.61891700  | 0.19710800  |
| C | 3.23473400  | 1.55173300  | 0.14052200  |
| H | 3.07894300  | 2.54466000  | 0.57780800  |
| C | 3.61215100  | -0.96520700 | -0.96215800 |
| H | 3.75086100  | -1.95931400 | -1.40313600 |
| C | 4.46111000  | 1.23777700  | -0.45380600 |
| H | 5.26157700  | 1.98281300  | -0.48239400 |
| C | 4.65181500  | -0.03153100 | -1.00996400 |
| H | 5.60207900  | -0.29339800 | -1.48420400 |
| C | -3.52445200 | 0.91613900  | -0.66895500 |
| C | -2.56936900 | 1.01509700  | -1.82001300 |
| C | -3.25827100 | 1.71716400  | 0.56983800  |
| C | -4.60196200 | 0.02834400  | -0.71727300 |
| N | -5.50938300 | -0.71962500 | -0.75575200 |
| H | -1.60465400 | 0.54115900  | -1.54761700 |
| H | -2.94813100 | 0.52238400  | -2.72648300 |
| H | -2.35472700 | 2.07508500  | -2.04577000 |
| H | -2.23314100 | 1.51085500  | 0.93508700  |
| H | -3.30645000 | 2.79901700  | 0.34496600  |
| H | -3.96877300 | 1.49089700  | 1.37767300  |

TS (RM5)

-1070.80466

|   |             |             |             |
|---|-------------|-------------|-------------|
| S | -0.01042500 | 1.03965200  | 1.51031400  |
| C | 0.97684800  | 1.42371600  | 0.02437200  |
| C | 1.17717200  | -1.59450200 | 0.62826000  |
| O | -0.12106500 | -1.23002800 | 0.12598400  |
| H | 1.21416300  | 2.49827600  | 0.08888400  |
| H | 0.30707400  | 1.28616400  | -0.84532300 |
| H | 1.15686700  | -1.55689100 | 1.73439600  |
| H | 1.31997600  | -2.64593600 | 0.32821800  |
| C | -0.84235400 | -0.37115500 | 0.90330300  |
| C | -2.20166800 | -0.57867300 | 1.04660800  |
| H | -2.57941300 | -1.59770900 | 0.91397200  |
| H | -2.75557400 | 0.08151800  | 1.71846200  |
| C | 2.32667500  | -0.76520700 | 0.08531300  |

|   |             |             |             |
|---|-------------|-------------|-------------|
| C | 2.25536800  | 0.62589900  | -0.13528400 |
| C | 3.40693500  | 1.30646800  | -0.56557900 |
| H | 3.34669100  | 2.38826900  | -0.73082000 |
| C | 3.54069900  | -1.43211000 | -0.14640600 |
| H | 3.58404600  | -2.51569100 | 0.01447000  |
| C | 4.61453600  | 0.63540100  | -0.78241200 |
| H | 5.49614000  | 1.19040200  | -1.11604400 |
| C | 4.68209900  | -0.74580300 | -0.57190300 |
| H | 5.61605000  | -1.28897200 | -0.74248800 |
| C | -3.26005500 | 0.17992600  | -0.71795100 |
| C | -2.50491200 | -0.47109600 | -1.85411900 |
| C | -3.10763700 | 1.67563200  | -0.56539800 |
| C | -4.52544200 | -0.37178000 | -0.38666200 |
| N | -5.53111400 | -0.86224900 | -0.03714500 |
| H | -1.46423300 | -0.10398400 | -1.85737400 |
| H | -2.48609300 | -1.56861600 | -1.75745000 |
| H | -2.95707700 | -0.21427100 | -2.83075400 |
| H | -2.03480700 | 1.93386000  | -0.54703700 |
| H | -3.56611700 | 2.21035100  | -1.41888600 |
| H | -3.57416800 | 2.04446000  | 0.36205100  |

RM5

-1070.83542

|   |             |             |             |
|---|-------------|-------------|-------------|
| S | 0.03919500  | 1.12355600  | -1.43728800 |
| C | -0.96258900 | 1.44352000  | 0.06130300  |
| C | -1.15763500 | -1.54679200 | -0.74235300 |
| O | 0.14350700  | -1.24286400 | -0.21727600 |
| H | -1.20964000 | 2.51821600  | 0.05183200  |
| H | -0.29942200 | 1.26205900  | 0.92812300  |
| H | -1.13521900 | -1.42176500 | -1.84258700 |
| H | -1.31713000 | -2.61619300 | -0.52495600 |
| C | 0.86402100  | -0.30583000 | -0.90809500 |
| C | 2.34687400  | -0.46629800 | -0.85792400 |
| H | 2.58365300  | -1.54062400 | -0.97764100 |
| H | 2.80197600  | 0.08258900  | -1.70203600 |
| C | -2.30122400 | -0.74945100 | -0.13812600 |
| C | -2.23468300 | 0.62647000  | 0.17065200  |
| C | -3.38892200 | 1.27261900  | 0.64551800  |
| H | -3.33253800 | 2.34254600  | 0.87669900  |
| C | -3.51321300 | -1.43272500 | 0.05756700  |
| H | -3.55370200 | -2.50421200 | -0.17103200 |
| C | -4.59352700 | 0.58531800  | 0.82483100  |
| H | -5.47584600 | 1.11543500  | 1.19520200  |
| C | -4.65609500 | -0.78033300 | 0.52965200  |
| H | -5.58684000 | -1.33770200 | 0.66946800  |
| C | 3.04992000  | 0.03225100  | 0.46547000  |
| C | 2.43875600  | -0.64284700 | 1.71120600  |
| C | 2.97663800  | 1.56774200  | 0.59958500  |
| C | 4.46765000  | -0.36412400 | 0.35134900  |
| N | 5.57912000  | -0.68663600 | 0.23527500  |
| H | 1.40189200  | -0.28776800 | 1.83319000  |
| H | 2.42061700  | -1.73927200 | 1.60232200  |
| H | 3.01087800  | -0.37703700 | 2.61406200  |
| H | 1.92610700  | 1.86752600  | 0.74016300  |
| H | 3.55484700  | 1.90543400  | 1.47450100  |
| H | 3.36551700  | 2.06611400  | -0.30324100 |

TS (RM5-Oopening)  
-1070.80967

|   |             |             |             |
|---|-------------|-------------|-------------|
| S | 0.07719600  | 1.44788300  | -0.81866600 |
| C | -1.35742900 | 1.50785400  | 0.28825200  |
| C | -1.21271500 | -1.48836500 | -0.61291700 |
| O | 0.15866400  | -0.82623300 | 0.48399100  |
| H | -1.70387800 | 2.55344900  | 0.25145200  |
| H | -0.95184400 | 1.33248000  | 1.30215300  |
| H | -0.74598900 | -1.17117000 | -1.55055200 |
| H | -1.17167200 | -2.56734900 | -0.43226600 |
| C | 0.86449200  | 0.02580600  | -0.15805600 |
| C | 2.22629800  | -0.30531800 | -0.71650800 |
| H | 2.22511600  | -1.36662400 | -1.03128200 |
| H | 2.44409200  | 0.32348300  | -1.60071400 |
| C | -2.44826500 | -0.80988200 | -0.20831400 |
| C | -2.54305800 | 0.58546300  | 0.05238700  |
| C | -3.81305700 | 1.13782100  | 0.29018700  |
| H | -3.88698800 | 2.21388100  | 0.48459000  |
| C | -3.61970600 | -1.59544200 | -0.12326500 |
| H | -3.53115100 | -2.67420600 | -0.29387800 |
| C | -4.97139900 | 0.35365000  | 0.31705300  |
| H | -5.94239500 | 0.82059900  | 0.50565500  |
| C | -4.87047900 | -1.02972800 | 0.12804500  |
| H | -5.76055800 | -1.66423000 | 0.16800200  |
| C | 3.37496100  | -0.09328200 | 0.32924900  |
| C | 3.18313700  | -1.00331600 | 1.56137300  |
| C | 3.44720200  | 1.38742600  | 0.76135500  |
| C | 4.63817000  | -0.45802400 | -0.34376700 |
| N | 5.62625800  | -0.74763300 | -0.88380000 |
| H | 2.26082900  | -0.70203100 | 2.08334900  |
| H | 3.09028600  | -2.06028400 | 1.26385400  |
| H | 4.03441500  | -0.89670500 | 2.25215600  |
| H | 2.51917800  | 1.64162100  | 1.30051800  |
| H | 4.30397600  | 1.55364800  | 1.43292100  |
| H | 3.53940500  | 2.05263400  | -0.11308300 |

TS (RM5-Sopening)  
-1070.8099

|   |             |             |             |
|---|-------------|-------------|-------------|
| S | -0.14809900 | 0.92029600  | 1.72216100  |
| C | 1.04105700  | 1.47324000  | -0.30907800 |
| C | 1.16324900  | -1.52155800 | 0.61729300  |
| O | -0.20525100 | -1.26860500 | 0.25183100  |
| H | 1.14749600  | 2.56338000  | -0.33154000 |
| H | 0.18622500  | 1.08653900  | -0.86588500 |
| H | 1.23553000  | -1.41698900 | 1.71822000  |
| H | 1.31021400  | -2.58403100 | 0.36077400  |
| C | -0.89556000 | -0.33830200 | 0.95385800  |
| C | -2.38524400 | -0.52566200 | 0.81878900  |
| H | -2.60186700 | -1.60981200 | 0.83427600  |
| H | -2.87893000 | -0.05469000 | 1.68413900  |
| C | 2.28402400  | -0.71431800 | -0.02219800 |
| C | 2.26060600  | 0.68298300  | -0.29366600 |
| C | 3.48564200  | 1.32603900  | -0.59313600 |
| H | 3.46521000  | 2.40599700  | -0.77792700 |
| C | 3.49462900  | -1.40963500 | -0.16161400 |

|   |             |             |             |
|---|-------------|-------------|-------------|
| H | 3.50438600  | -2.48935900 | 0.03052100  |
| C | 4.68402400  | 0.62296500  | -0.69690700 |
| H | 5.60874400  | 1.15108000  | -0.94734700 |
| C | 4.68790600  | -0.76316000 | -0.49921900 |
| H | 5.61376800  | -1.33746200 | -0.59363400 |
| C | -3.03041800 | 0.07166600  | -0.48340800 |
| C | -2.40600800 | -0.52905800 | -1.76070800 |
| C | -2.93686900 | 1.61237500  | -0.50188400 |
| C | -4.45814800 | -0.31026900 | -0.43566600 |
| N | -5.57823200 | -0.61651300 | -0.38869700 |
| H | -1.36136000 | -0.19252200 | -1.85716600 |
| H | -2.41184600 | -1.63033300 | -1.72428600 |
| H | -2.96566600 | -0.19675900 | -2.64942400 |
| H | -1.88228600 | 1.92109900  | -0.57366400 |
| H | -3.48386400 | 2.01513700  | -1.36939100 |
| H | -3.35986700 | 2.04458800  | 0.41925300  |

RM5-Oopened  
-1070.86

|   |             |             |             |
|---|-------------|-------------|-------------|
| S | 0.05298600  | -0.72661100 | -0.27909600 |
| C | 1.34615700  | -0.64125800 | 1.00693500  |
| C | 2.17297400  | 2.04780300  | 0.01357600  |
| O | -1.05198600 | 1.09371600  | 1.31068500  |
| H | 1.34904300  | -1.60784800 | 1.53415200  |
| H | 1.01639400  | 0.14312300  | 1.70975200  |
| H | 2.49146500  | 3.01979700  | -0.36998500 |
| H | 1.18641700  | 1.98580200  | 0.47391000  |
| C | -1.15438700 | 0.43143100  | 0.29555300  |
| C | -2.35855300 | 0.50498300  | -0.63902800 |
| H | -2.52860200 | 1.56734000  | -0.88728700 |
| H | -2.14411200 | -0.04709900 | -1.57061200 |
| C | 3.04975700  | 0.94369100  | -0.07431100 |
| C | 2.70294300  | -0.36824400 | 0.40526300  |
| C | 3.62559000  | -1.40953400 | 0.29619900  |
| H | 3.34502800  | -2.40169800 | 0.66831800  |
| C | 4.34650200  | 1.11346600  | -0.65388400 |
| H | 4.61757900  | 2.11027100  | -1.01935500 |
| C | 4.89443800  | -1.21264500 | -0.27244900 |
| H | 5.59851600  | -2.04622000 | -0.34184200 |
| C | 5.24779700  | 0.06150800  | -0.75156900 |
| H | 6.23270600  | 0.22570900  | -1.19886900 |
| C | -3.65043800 | -0.08270400 | 0.02007700  |
| C | -4.16318400 | 0.79265300  | 1.18537200  |
| C | -3.41485100 | -1.53212800 | 0.50128100  |
| C | -4.68140100 | -0.09618300 | -1.03957600 |
| N | -5.49414500 | -0.10616400 | -1.87033300 |
| H | -3.43277900 | 0.76755700  | 2.00722100  |
| H | -4.30247100 | 1.83699700  | 0.86404500  |
| H | -5.12477000 | 0.39946200  | 1.55154700  |
| H | -2.69729800 | -1.51695200 | 1.33920100  |
| H | -4.35781700 | -1.97481100 | 0.85729800  |
| H | -3.00224100 | -2.15925600 | -0.30573700 |

RM5-Sopened  
-1070.82932

|   |             |            |             |
|---|-------------|------------|-------------|
| S | -1.24442000 | 2.60592400 | -0.51069500 |
|---|-------------|------------|-------------|

|   |             |             |             |
|---|-------------|-------------|-------------|
| C | 1.85983000  | 0.67933600  | 1.92838500  |
| C | 0.73509700  | -0.81382600 | -0.38896600 |
| O | 0.14639100  | 0.47973500  | -0.72898000 |
| H | 2.29184700  | 1.22852700  | 2.76737600  |
| H | 0.77514800  | 0.56672900  | 1.91729000  |
| H | 0.25937000  | -1.23780000 | 0.50864900  |
| H | 0.54726800  | -1.48372000 | -1.24378400 |
| C | -0.93509400 | 1.02314400  | -0.17842100 |
| C | -1.86902100 | 0.20967300  | 0.70350300  |
| H | -1.32991100 | -0.52757900 | 1.32239100  |
| H | -2.36800500 | 0.91803000  | 1.38137700  |
| C | 2.21346000  | -0.60402800 | -0.19628700 |
| C | 2.70443400  | 0.13448600  | 0.93622600  |
| C | 4.11988100  | 0.30737400  | 1.04396200  |
| H | 4.50513200  | 0.87094800  | 1.90065400  |
| C | 3.10705000  | -1.12336500 | -1.13146300 |
| H | 2.71006400  | -1.67952300 | -1.98820100 |
| C | 4.99265000  | -0.22330500 | 0.10271000  |
| H | 6.07078200  | -0.07555100 | 0.21587400  |
| C | 4.49379900  | -0.94845600 | -0.99407200 |
| H | 5.17589500  | -1.36775900 | -1.73822200 |
| C | -2.98497500 | -0.55309000 | -0.10266500 |
| C | -2.39642000 | -1.57097500 | -1.10301300 |
| C | -3.93588000 | 0.41388900  | -0.84158400 |
| C | -3.76687100 | -1.28918100 | 0.91348100  |
| N | -4.37971100 | -1.87022300 | 1.71178400  |
| H | -1.80597700 | -1.02949400 | -1.86182800 |
| H | -1.75619600 | -2.31325700 | -0.60087700 |
| H | -3.21159600 | -2.10210800 | -1.61822800 |
| H | -3.39678000 | 0.88937200  | -1.67550100 |
| H | -4.78961600 | -0.14983800 | -1.24948100 |
| H | -4.30749500 | 1.20186200  | -0.16778600 |

R...Sty

-519.946423

|   |             |             |             |
|---|-------------|-------------|-------------|
| C | -0.30255100 | 1.42455400  | 0.76670000  |
| C | 0.77622500  | 1.03324300  | 1.46854100  |
| H | 1.60353400  | 1.72144300  | 1.66227500  |
| H | 0.89053500  | 0.01809400  | 1.86567100  |
| H | -0.33810300 | 2.45905700  | 0.39642400  |
| C | -1.63470400 | -0.73847600 | 0.80027500  |
| C | -2.77366000 | -1.45906400 | 0.43936700  |
| C | -3.79104300 | -0.85116600 | -0.31354100 |
| C | -3.65605200 | 0.48627600  | -0.70280700 |
| C | -2.51360500 | 1.20754600  | -0.34010400 |
| C | -1.48347000 | 0.61250900  | 0.41655000  |
| H | -0.85023400 | -1.23054700 | 1.38508900  |
| H | -2.87281800 | -2.50468000 | 0.74685600  |
| H | -4.68228200 | -1.42044700 | -0.59351600 |
| H | -4.44233300 | 0.97034400  | -1.29001300 |
| H | -2.40634400 | 2.25573300  | -0.64264000 |
| C | 2.65725200  | -0.33206200 | -0.74866700 |
| C | 2.69199900  | 0.80118000  | -1.72808400 |
| C | 1.58446700  | -1.37145700 | -0.88003500 |
| C | 3.57673500  | -0.39627800 | 0.30098100  |
| N | 4.34064200  | -0.44809100 | 1.19439400  |



|   |            |             |             |
|---|------------|-------------|-------------|
| H | 1.75576000 | 1.38751100  | -1.63838000 |
| H | 3.54758400 | 1.47206700  | -1.56985000 |
| H | 2.72500000 | 0.41328100  | -2.76269000 |
| H | 0.61718200 | -0.87715300 | -1.08535700 |
| H | 1.79346000 | -2.04081900 | -1.73621200 |
| H | 1.48500900 | -1.98806900 | 0.02653000  |

TS (RSty)

-519.926989

|   |             |             |             |
|---|-------------|-------------|-------------|
| C | 0.07752200  | 0.94798100  | -0.98689300 |
| C | -1.07240200 | 0.26267000  | -1.32742900 |
| H | -1.88285400 | 0.79652100  | -1.83205700 |
| H | -1.06941000 | -0.82388100 | -1.46418600 |
| H | 0.04719500  | 2.04563000  | -1.01142400 |
| C | 1.56079600  | -1.02138000 | -0.42201800 |
| C | 2.78378300  | -1.51235900 | 0.03039200  |
| C | 3.81429600  | -0.63155200 | 0.39984000  |
| C | 3.60573300  | 0.75202200  | 0.31057000  |
| C | 2.38155500  | 1.24676800  | -0.14068000 |
| C | 1.32914900  | 0.37521400  | -0.51677800 |
| H | 0.77198600  | -1.72509000 | -0.70617400 |
| H | 2.94158600  | -2.59331400 | 0.09566800  |
| H | 4.77219100  | -1.02373000 | 0.75336500  |
| H | 4.40202200  | 1.44645600  | 0.59523300  |
| H | 2.21593000  | 2.32798100  | -0.21100000 |
| C | -2.32286600 | 0.09381900  | 0.53265000  |
| C | -2.53359800 | 1.54555000  | 0.88808300  |
| C | -1.42971800 | -0.71618400 | 1.43848700  |
| C | -3.39378200 | -0.58517200 | -0.10266400 |
| N | -4.23799700 | -1.14308200 | -0.69380800 |
| H | -1.55429700 | 2.02042000  | 1.06988600  |
| H | -3.05558500 | 2.09280200  | 0.08748500  |
| H | -3.13044600 | 1.63808300  | 1.81515600  |
| H | -0.48097500 | -0.17582600 | 1.59693400  |
| H | -1.90456900 | -0.85814500 | 2.42823200  |
| H | -1.20959600 | -1.71060500 | 1.01817500  |

RSty

-519.959852

|   |             |             |             |
|---|-------------|-------------|-------------|
| C | 0.06469100  | 0.97002500  | -0.67829000 |
| C | -1.19543600 | 0.22825800  | -0.99432400 |
| H | -1.74421800 | 0.75986700  | -1.79449900 |
| H | -0.98921200 | -0.79222800 | -1.36266900 |
| H | 0.01364600  | 2.06500100  | -0.68730800 |
| C | 1.55930500  | -1.01408900 | -0.28670300 |
| C | 2.82252400  | -1.51562700 | 0.01455400  |
| C | 3.90486100  | -0.64883400 | 0.24430000  |
| C | 3.70330700  | 0.74153400  | 0.16933300  |
| C | 2.44642500  | 1.25260200  | -0.13066600 |
| C | 1.32917000  | 0.39330600  | -0.37129100 |
| H | 0.73377100  | -1.71156200 | -0.45584000 |
| H | 2.97155300  | -2.59837200 | 0.07369700  |
| H | 4.89356100  | -1.05186100 | 0.48037500  |
| H | 4.53927000  | 1.42509600  | 0.34746400  |
| H | 2.28959200  | 2.33570800  | -0.19035900 |
| C | -2.17189200 | 0.11094900  | 0.23521200  |

|   |             |             |             |
|---|-------------|-------------|-------------|
| C | -2.53286600 | 1.50789900  | 0.78446800  |
| C | -1.55303700 | -0.75847600 | 1.34987500  |
| C | -3.40203000 | -0.54382700 | -0.25220000 |
| N | -4.36280200 | -1.06208200 | -0.65305900 |
| H | -1.62516200 | 1.96573300  | 1.21107300  |
| H | -2.91950100 | 2.16104900  | -0.01493700 |
| H | -3.29075000 | 1.42816600  | 1.57944200  |
| H | -0.61609300 | -0.28553500 | 1.68916600  |
| H | -2.24090700 | -0.83587500 | 2.20682300  |
| H | -1.32606700 | -1.77293800 | 0.98338000  |

RSty...M5  
-1380.019841

|   |             |             |             |
|---|-------------|-------------|-------------|
| C | 1.17550900  | 1.32277400  | 0.22933800  |
| H | 0.16570000  | 1.27676000  | 0.68263000  |
| H | 1.76434100  | 2.05288900  | 0.81234600  |
| C | 4.16246400  | 0.62778400  | 0.75623600  |
| C | 5.48064300  | 0.25207300  | 0.99983500  |
| C | 5.85419100  | -1.10307700 | 1.00016700  |
| C | 4.88154100  | -2.08820500 | 0.74835800  |
| C | 3.56316700  | -1.72402500 | 0.50381500  |
| C | 3.15614500  | -0.35330600 | 0.50147000  |
| H | 3.89857200  | 1.68965300  | 0.75356800  |
| H | 6.23368900  | 1.02301700  | 1.19111200  |
| H | 6.89210100  | -1.38851800 | 1.19235000  |
| H | 5.16343200  | -3.14571100 | 0.74447600  |
| H | 2.80277300  | -2.48988600 | 0.30698500  |
| C | 0.98975100  | 1.89386000  | -1.22595900 |
| C | 0.18763200  | 0.90515500  | -2.09988500 |
| C | 2.35546800  | 2.20566400  | -1.87101100 |
| C | 0.21096100  | 3.14158600  | -1.09679500 |
| N | -0.41088400 | 4.11683500  | -0.97411900 |
| H | 0.79102300  | -0.00350700 | -2.26649000 |
| H | -0.74957800 | 0.61601900  | -1.59589300 |
| H | -0.05090100 | 1.35359500  | -3.07744200 |
| H | 2.93788400  | 1.27047100  | -1.92979200 |
| H | 2.22341200  | 2.60373400  | -2.88970200 |
| H | 2.92168300  | 2.93842200  | -1.27266400 |
| S | -3.00924600 | 1.26808400  | 0.86218000  |
| C | -3.83198300 | 0.04778900  | -0.21207200 |
| C | -1.64333800 | -1.40714100 | 1.40117100  |
| O | -2.79765000 | -1.04237900 | 2.16834100  |
| H | -4.33137900 | 0.62521000  | -1.00650100 |
| H | -4.61694100 | -0.43973100 | 0.39002700  |
| H | -0.84826000 | -0.64937600 | 1.55747700  |
| H | -1.28321000 | -2.35269500 | 1.84242700  |
| C | -2.98795900 | 0.30081300  | 2.33987000  |
| C | -1.88878800 | -1.62410400 | -0.08346800 |
| C | -2.87811500 | -0.95333500 | -0.83179200 |
| C | -2.96224900 | -1.19099400 | -2.21452600 |
| H | -3.72819300 | -0.66074800 | -2.79178200 |
| C | -1.02264000 | -2.51481400 | -0.73987000 |
| H | -0.26608500 | -3.04551400 | -0.14683800 |
| C | -2.08101800 | -2.06224400 | -2.86267400 |
| H | -2.16220500 | -2.22008400 | -3.94201100 |
| C | -1.09901400 | -2.72725400 | -2.11962100 |

|   |             |             |             |
|---|-------------|-------------|-------------|
| H | -0.40414100 | -3.41676200 | -2.60762200 |
| C | -3.17584200 | 0.82393900  | 3.56184500  |
| H | -3.46483300 | 1.86865000  | 3.67713200  |
| H | -3.04769800 | 0.20139200  | 4.44996500  |
| C | 1.79251200  | -0.03849500 | 0.24647600  |
| H | 1.12990400  | -0.88210200 | 0.01800500  |

TS (RStyM5)  
-1379.993448

|   |             |             |             |
|---|-------------|-------------|-------------|
| C | -1.74781800 | 1.28658500  | -0.51043200 |
| H | -0.77590800 | 1.46660200  | -1.00739200 |
| H | -2.52522900 | 1.45931200  | -1.27478300 |
| C | -4.23238200 | -0.56024700 | -0.61503400 |
| C | -5.36456800 | -1.37458300 | -0.53397700 |
| C | -5.35545400 | -2.54321400 | 0.24138400  |
| C | -4.18767100 | -2.89176400 | 0.93992000  |
| C | -3.05712700 | -2.08138100 | 0.86348400  |
| C | -3.04666500 | -0.88845500 | 0.09089500  |
| H | -4.27752700 | 0.34575500  | -1.22644800 |
| H | -6.26863700 | -1.09157300 | -1.08263500 |
| H | -6.24610500 | -3.17499100 | 0.30088300  |
| H | -4.16372000 | -3.80137000 | 1.54847100  |
| H | -2.14355200 | -2.35698200 | 1.40601200  |
| C | -1.88309000 | 2.38699700  | 0.60075100  |
| C | -0.66443200 | 2.35576500  | 1.55126400  |
| C | -3.19678100 | 2.23667100  | 1.39717400  |
| C | -1.89463600 | 3.68922500  | -0.09599600 |
| N | -1.90432500 | 4.70508300  | -0.66221900 |
| H | -0.69004700 | 1.42815400  | 2.14675600  |
| H | 0.27929500  | 2.38749600  | 0.97830400  |
| H | -0.68937300 | 3.20953600  | 2.24675800  |
| H | -3.16883900 | 1.28401800  | 1.95192400  |
| H | -3.31219800 | 3.06258100  | 2.11700300  |
| H | -4.06887300 | 2.22220300  | 0.72266900  |
| S | 1.60010200  | 0.41084800  | -1.78593300 |
| C | 3.24792100  | -0.36856700 | -1.83573300 |
| C | 1.93343100  | -0.98321300 | 0.87965000  |
| O | 1.34181200  | -1.71525100 | -0.20847400 |
| H | 3.81850000  | 0.18281200  | -2.60049000 |
| H | 3.09975000  | -1.39725700 | -2.20773000 |
| H | 1.36338900  | -0.04368300 | 1.03562100  |
| H | 1.79214400  | -1.61439400 | 1.77362900  |
| C | 0.70970300  | -0.95938000 | -1.15917700 |
| C | 3.41224500  | -0.68535800 | 0.71155800  |
| C | 4.00658600  | -0.35324200 | -0.52374400 |
| C | 5.37336000  | -0.02819400 | -0.55381300 |
| H | 5.82932000  | 0.23435700  | -1.51532800 |
| C | 4.20416700  | -0.69667200 | 1.87101500  |
| H | 3.73671300  | -0.97033500 | 2.82428800  |
| C | 6.15195800  | -0.03159600 | 0.60795600  |
| H | 7.21372400  | 0.22630000  | 0.55531100  |
| C | 5.56287400  | -0.36902300 | 1.83101500  |
| H | 6.15735100  | -0.38334800 | 2.74908500  |
| C | -0.62246800 | -1.21119000 | -1.43449500 |
| H | -1.06499400 | -0.78100300 | -2.33778600 |
| H | -1.02966400 | -2.16329900 | -1.08060400 |

|   |             |             |            |
|---|-------------|-------------|------------|
| C | -1.81108500 | -0.12236500 | 0.01549200 |
| H | -1.09978800 | -0.35885000 | 0.81978700 |

RStyM5

-1380.024226

|   |             |             |             |
|---|-------------|-------------|-------------|
| C | 2.01689300  | 1.06401900  | 0.79129500  |
| H | 1.19415300  | 1.26814700  | 1.50345600  |
| H | 2.93426800  | 0.91515500  | 1.38952600  |
| C | 3.71607200  | -1.56307900 | 0.79792200  |
| C | 4.82483200  | -2.38448800 | 0.56668800  |
| C | 5.17325900  | -2.74422500 | -0.74223000 |
| C | 4.40179200  | -2.28033200 | -1.81430900 |
| C | 3.29104300  | -1.46077400 | -1.57618200 |
| C | 2.93614500  | -1.08589300 | -0.27073100 |
| H | 3.44989100  | -1.28969600 | 1.82647500  |
| H | 5.41968600  | -2.74552900 | 1.41145600  |
| H | 6.04252200  | -3.38311200 | -0.92442300 |
| H | 4.66483600  | -2.55586300 | -2.84034100 |
| H | 2.68738600  | -1.09772900 | -2.41739800 |
| C | 2.19913600  | 2.33584000  | -0.08800600 |
| C | 0.85736400  | 2.77088600  | -0.72354900 |
| C | 3.27625500  | 2.13332200  | -1.17781400 |
| C | 2.64491800  | 3.41713300  | 0.81642000  |
| N | 2.99383600  | 4.26303800  | 1.53386700  |
| H | 0.52251300  | 2.00612000  | -1.44301000 |
| H | 0.08007100  | 2.88662800  | 0.05177200  |
| H | 0.97305200  | 3.72556000  | -1.26108900 |
| H | 2.90651300  | 1.40924700  | -1.92210200 |
| H | 3.48951600  | 3.08235000  | -1.69493300 |
| H | 4.20979800  | 1.73988200  | -0.74202700 |
| S | -1.89471200 | -0.78094900 | 2.00901100  |
| C | -3.02609600 | -1.72345100 | 0.91824600  |
| C | -2.25770200 | 0.95778300  | -0.41373600 |
| O | -1.17058500 | 0.02387700  | -0.41774100 |
| H | -3.57761200 | -2.42562400 | 1.56494100  |
| H | -2.38474300 | -2.32361000 | 0.24792400  |
| H | -2.18153100 | 1.58744900  | 0.49578600  |
| H | -2.09354000 | 1.60977600  | -1.28991200 |
| C | -0.69465600 | -0.34199800 | 0.81336400  |
| C | -3.63395200 | 0.32477400  | -0.51848800 |
| C | -4.00351400 | -0.87196100 | 0.13347800  |
| C | -5.33141000 | -1.31945300 | 0.02683000  |
| H | -5.61468100 | -2.24513500 | 0.54093400  |
| C | -4.59759100 | 1.01881000  | -1.26885300 |
| H | -4.29839200 | 1.93917700  | -1.78406400 |
| C | -6.28654600 | -0.61422500 | -0.71232300 |
| H | -7.31299800 | -0.98705800 | -0.77666500 |
| C | -5.91630400 | 0.56500200  | -1.36726700 |
| H | -6.64700100 | 1.12738300  | -1.95575700 |
| C | 0.62535500  | -1.05512100 | 0.73626400  |
| H | 0.96570000  | -1.27958500 | 1.76379900  |
| H | 0.50233300  | -2.03534800 | 0.22028400  |
| C | 1.70406100  | -0.22702300 | -0.01177400 |
| H | 1.27535500  | 0.04103300  | -0.99541200 |

TS (RStyM5-Opening)

-1380.000693

|   |             |             |             |
|---|-------------|-------------|-------------|
| C | -1.43371700 | 0.92894300  | -0.79636900 |
| H | -0.40512800 | 1.00928700  | -1.20065700 |
| H | -2.10163300 | 0.86031200  | -1.67616800 |
| C | -3.89932100 | -0.99911800 | -0.78145900 |
| C | -5.20393800 | -1.44485900 | -0.54020500 |
| C | -5.62170900 | -1.72909900 | 0.76674300  |
| C | -4.72145600 | -1.57317900 | 1.82797700  |
| C | -3.41732300 | -1.12754000 | 1.58096000  |
| C | -2.99305200 | -0.82262000 | 0.27828000  |
| H | -3.58392500 | -0.78865500 | -1.81034700 |
| H | -5.89741600 | -1.57213500 | -1.37727500 |
| H | -6.64237000 | -2.07464300 | 0.95557700  |
| H | -5.03529900 | -1.79705700 | 2.85228500  |
| H | -2.71388000 | -0.99837000 | 2.41290000  |
| C | -1.74367500 | 2.26476500  | -0.04762200 |
| C | -0.66140200 | 2.60771100  | 1.00253600  |
| C | -3.13502400 | 2.28610500  | 0.62544300  |
| C | -1.71737800 | 3.32512900  | -1.07934600 |
| N | -1.69510200 | 4.15523800  | -1.89313700 |
| H | -0.61419000 | 1.80617400  | 1.75920600  |
| H | 0.33008400  | 2.71904700  | 0.53501200  |
| H | -0.91528900 | 3.54916900  | 1.51542700  |
| H | -3.12022000 | 1.62094600  | 1.50335200  |
| H | -3.37090300 | 3.30668600  | 0.96695200  |
| H | -3.92369900 | 1.94205300  | -0.06332300 |
| S | 1.62541300  | -0.94816600 | -1.98236900 |
| C | 3.27073500  | -1.39657100 | -1.36250200 |
| C | 1.89848500  | 0.02153300  | 1.05324300  |
| O | 1.22630300  | -1.62522200 | 0.51343400  |
| H | 3.90592100  | -1.45000300 | -2.26175700 |
| H | 3.16486400  | -2.42727100 | -0.97573100 |
| H | 1.32269600  | 0.60045600  | 0.32581500  |
| H | 1.54292200  | 0.11980600  | 2.08573100  |
| C | 0.66286600  | -1.52754700 | -0.63358500 |
| C | 3.34976600  | -0.02627500 | 0.85851200  |
| C | 3.96640100  | -0.53706100 | -0.31768000 |
| C | 5.35801400  | -0.40118700 | -0.45563300 |
| H | 5.83385200  | -0.78760100 | -1.36425100 |
| C | 4.16859200  | 0.51155000  | 1.87618900  |
| H | 3.68492300  | 0.87545600  | 2.78966200  |
| C | 6.15014800  | 0.18059900  | 0.54043300  |
| H | 7.23090300  | 0.26807300  | 0.39626600  |
| C | 5.55150600  | 0.62323900  | 1.72620800  |
| H | 6.15586000  | 1.06142400  | 2.52571900  |
| C | -0.83962300 | -1.53242000 | -0.77189400 |
| H | -1.13250200 | -1.48133200 | -1.83822300 |
| H | -1.21338400 | -2.49560700 | -0.37523800 |
| C | -1.55707300 | -0.38231500 | 0.01438900  |
| H | -1.04444700 | -0.27915100 | 0.99373800  |

TS (RStyM5-Sopening)

-1380.001382

|   |             |            |             |
|---|-------------|------------|-------------|
| C | -2.04086000 | 1.09117700 | -0.72519200 |
| H | -1.25905600 | 1.27023200 | -1.48828600 |
| H | -3.00746300 | 1.04226800 | -1.25817400 |

|   |             |             |             |
|---|-------------|-------------|-------------|
| C | -3.78279600 | -1.50071500 | -0.95087200 |
| C | -4.92414400 | -2.29578600 | -0.80491000 |
| C | -5.34684400 | -2.69162000 | 0.47173400  |
| C | -4.61819900 | -2.28997400 | 1.59730600  |
| C | -3.47263100 | -1.49787700 | 1.44533000  |
| C | -3.04346300 | -1.09004200 | 0.17299900  |
| H | -3.45839300 | -1.19226200 | -1.95266500 |
| H | -5.48725100 | -2.60737400 | -1.69006700 |
| H | -6.24192600 | -3.31002100 | 0.58711300  |
| H | -4.94125400 | -2.59325900 | 2.59798600  |
| H | -2.90037700 | -1.18571600 | 2.32770000  |
| C | -2.06325000 | 2.32588800  | 0.22312000  |
| C | -0.65698800 | 2.60635400  | 0.80306000  |
| C | -3.10272900 | 2.15861100  | 1.35511400  |
| C | -2.45482600 | 3.48879200  | -0.60145200 |
| N | -2.76292500 | 4.39919700  | -1.25563800 |
| H | -0.34436900 | 1.76435900  | 1.44392700  |
| H | 0.08121900  | 2.72401400  | -0.00923700 |
| H | -0.66382000 | 3.52054800  | 1.41763000  |
| H | -2.77227500 | 1.36221100  | 2.04180500  |
| H | -3.20167500 | 3.09130800  | 1.93267800  |
| H | -4.08824000 | 1.88024100  | 0.94589500  |
| S | 1.57013600  | 0.16168300  | -1.91466700 |
| C | 3.24779000  | -1.47355500 | -1.40428400 |
| C | 2.25951400  | 0.32570100  | 0.98130700  |
| O | 1.14769300  | -0.50626100 | 0.60292700  |
| H | 3.69932200  | -1.77772700 | -2.35485800 |
| H | 2.44632100  | -2.12716400 | -1.05374500 |
| H | 2.13664000  | 1.30279200  | 0.47403400  |
| H | 2.11879200  | 0.48108000  | 2.06400000  |
| C | 0.65849200  | -0.40925200 | -0.65369200 |
| C | 3.67476000  | -0.17892900 | 0.74147900  |
| C | 4.13212300  | -0.86488100 | -0.42036300 |
| C | 5.52994100  | -0.98570200 | -0.61604700 |
| H | 5.87819700  | -1.49104700 | -1.52383800 |
| C | 4.61704700  | 0.25517800  | 1.68732200  |
| H | 4.25782000  | 0.76659100  | 2.58818300  |
| C | 6.45209700  | -0.52170400 | 0.32097800  |
| H | 7.52398700  | -0.64899500 | 0.14307700  |
| C | 5.99285800  | 0.08797500  | 1.49573100  |
| H | 6.69799000  | 0.44424800  | 2.25193200  |
| C | -0.68890000 | -1.07044700 | -0.75437900 |
| H | -0.96710900 | -1.17916600 | -1.81568100 |
| H | -0.62515700 | -2.07962300 | -0.30037900 |
| C | -1.78063200 | -0.25624100 | 0.00487900  |
| H | -1.37532600 | -0.06646800 | 1.01668900  |

RStyM5-Oopened

-1380.063408

|   |             |             |             |
|---|-------------|-------------|-------------|
| C | -1.24659400 | 0.80931000  | -0.24869700 |
| H | -0.14901800 | 0.66131500  | -0.23133200 |
| H | -1.53228600 | 0.86584500  | -1.31500100 |
| C | -3.54151900 | -0.89490100 | -1.52727100 |
| C | -4.81038300 | -1.19406000 | -2.03653400 |
| C | -5.91108200 | -1.28734900 | -1.17477100 |
| C | -5.73194400 | -1.08468700 | 0.19908900  |

|   |             |             |             |
|---|-------------|-------------|-------------|
| C | -4.46024200 | -0.78678700 | 0.70327300  |
| C | -3.35123100 | -0.68063400 | -0.15109900 |
| H | -2.68689300 | -0.83280800 | -2.21175500 |
| H | -4.93968600 | -1.35603000 | -3.11106800 |
| H | -6.90361200 | -1.51779900 | -1.57304000 |
| H | -6.58475200 | -1.15609100 | 0.88115800  |
| H | -4.32116700 | -0.62217900 | 1.77910000  |
| C | -1.53424700 | 2.19053400  | 0.41314900  |
| C | -0.92759500 | 2.28998600  | 1.83339800  |
| C | -3.04491900 | 2.50673000  | 0.46008200  |
| C | -0.84832900 | 3.19593800  | -0.42724600 |
| N | -0.28599800 | 3.97390800  | -1.08380000 |
| H | -1.39549200 | 1.54492500  | 2.49575600  |
| H | 0.15842000  | 2.10684500  | 1.81524400  |
| H | -1.11204600 | 3.29140700  | 2.25431700  |
| H | -3.52439400 | 1.83915200  | 1.19481000  |
| H | -3.21291200 | 3.54807600  | 0.77737700  |
| H | -3.51930500 | 2.34346300  | -0.52201900 |
| S | 1.61465100  | -2.03082700 | -0.01156000 |
| C | 3.07783300  | -1.63354200 | 1.00699600  |
| C | 2.61779100  | 1.25546000  | 0.46494900  |
| O | 0.36226400  | -0.94914700 | 2.06931400  |
| H | 3.55126300  | -2.58376500 | 1.29829900  |
| H | 2.68788200  | -1.14076100 | 1.91437600  |
| H | 1.91915100  | 0.75214500  | 1.13318100  |
| H | 2.42765400  | 2.30615300  | 0.22634300  |
| C | 0.25781000  | -1.46927600 | 0.97353500  |
| C | 3.76981500  | 0.60853100  | -0.03561600 |
| C | 4.04993500  | -0.77851400 | 0.22883900  |
| C | 5.21705700  | -1.35348600 | -0.27583400 |
| H | 5.41589700  | -2.41098400 | -0.06680900 |
| C | 4.71060000  | 1.33640700  | -0.82843000 |
| H | 4.49966800  | 2.39163200  | -1.03440100 |
| C | 6.13165900  | -0.61104200 | -1.04053600 |
| H | 7.04022400  | -1.08664800 | -1.41976400 |
| C | 5.86594000  | 0.74157900  | -1.31891700 |
| H | 6.56911100  | 1.32647000  | -1.91927500 |
| C | -1.08187700 | -1.65984100 | 0.26844100  |
| H | -0.92137100 | -1.90258800 | -0.79863300 |
| H | -1.58796300 | -2.52646300 | 0.73250900  |
| C | -1.96438100 | -0.39465600 | 0.41607900  |
| H | -2.07346800 | -0.20646800 | 1.50040800  |

RStyM5-Sopened  
-1380.039294

|   |             |             |             |
|---|-------------|-------------|-------------|
| C | -1.82521400 | 1.36509900  | -0.16364800 |
| H | -1.43326600 | 1.93031900  | -1.02965000 |
| H | -2.92087900 | 1.50609600  | -0.16268800 |
| C | -3.89404900 | -0.93073300 | -0.64022000 |
| C | -4.96754200 | -1.77617300 | -0.34185400 |
| C | -4.83746700 | -2.75245600 | 0.65551700  |
| C | -3.62707000 | -2.87834200 | 1.34717600  |
| C | -2.55316400 | -2.03234700 | 1.04144900  |
| C | -2.67406600 | -1.04709800 | 0.04935600  |
| H | -4.00321300 | -0.16810400 | -1.42135900 |
| H | -5.90979900 | -1.67272700 | -0.88866700 |

|   |             |             |             |
|---|-------------|-------------|-------------|
| H | -5.67802200 | -3.41140200 | 0.89244400  |
| H | -3.51676900 | -3.63670000 | 2.12841000  |
| H | -1.60412200 | -2.13257400 | 1.58245400  |
| C | -1.24597200 | 2.01637800  | 1.12711700  |
| C | 0.30045400  | 2.06244100  | 1.08739600  |
| C | -1.73807200 | 1.29264500  | 2.40131000  |
| C | -1.74325900 | 3.40823100  | 1.15795900  |
| N | -2.13679200 | 4.50202200  | 1.17687300  |
| H | 0.70699900  | 1.03962900  | 1.14946400  |
| H | 0.65206300  | 2.52773900  | 0.14834200  |
| H | 0.69602300  | 2.63775100  | 1.93984300  |
| H | -1.30172500 | 0.28101500  | 2.43895000  |
| H | -1.42181700 | 1.83777200  | 3.30462700  |
| H | -2.83691900 | 1.19998500  | 2.40108200  |
| S | 0.51611600  | 1.37315700  | -3.21425400 |
| C | 3.40846800  | -2.45854000 | -1.09657200 |
| C | 2.57442600  | 0.38906700  | -1.26353300 |
| O | 1.24527700  | -0.20149500 | -1.21478300 |
| H | 3.73747800  | -3.49772800 | -1.02895800 |
| H | 2.82386300  | -2.16887700 | -1.97033200 |
| H | 3.01512500  | 0.14487900  | -2.24815200 |
| H | 2.47242300  | 1.48604300  | -1.19590500 |
| C | 0.30777800  | 0.22984100  | -2.05101300 |
| C | 3.36011100  | -0.16203400 | -0.10574800 |
| C | 3.74848700  | -1.54645600 | -0.07277300 |
| C | 4.51071100  | -1.98958700 | 1.05311900  |
| H | 4.81328300  | -3.04197100 | 1.08789300  |
| C | 3.72732700  | 0.68952000  | 0.93637300  |
| H | 3.41862900  | 1.74139100  | 0.89020600  |
| C | 4.86806900  | -1.12237800 | 2.07786000  |
| H | 5.45319600  | -1.49248700 | 2.92512500  |
| C | 4.47951000  | 0.22861300  | 2.02921300  |
| H | 4.75794600  | 0.91525900  | 2.83286800  |
| C | -1.00363200 | -0.46568700 | -1.74662800 |
| H | -1.75757100 | -0.15516000 | -2.48708600 |
| H | -0.84574700 | -1.55677900 | -1.83349000 |
| C | -1.49496500 | -0.14844300 | -0.30254400 |
| H | -0.66491000 | -0.41542000 | 0.37692200  |

RMAM5

-1377.1793216

|   |            |             |             |
|---|------------|-------------|-------------|
| C | 1.84489900 | 0.74284500  | 0.76427000  |
| H | 0.83042400 | 0.96393500  | 1.14745500  |
| H | 2.50860600 | 0.62208700  | 1.64060200  |
| C | 3.22702600 | -1.18947700 | -0.09744300 |
| C | 2.31648300 | 1.97535800  | -0.06823800 |
| C | 1.25793100 | 2.39370200  | -1.11485800 |
| C | 3.67158000 | 1.73240400  | -0.77115600 |
| C | 2.47729200 | 3.09884400  | 0.88012000  |
| N | 2.59825400 | 3.98508600  | 1.62180900  |
| H | 1.09519500 | 1.57231600  | -1.83421300 |
| H | 0.29953300 | 2.64023700  | -0.62887200 |
| H | 1.60284800 | 3.27761100  | -1.67521400 |
| H | 3.54191100 | 0.97110800  | -1.56142100 |
| H | 4.02201900 | 2.66148600  | -1.24823300 |
| H | 4.43513700 | 1.38353000  | -0.05806400 |



|   |             |             |             |
|---|-------------|-------------|-------------|
| S | -1.37843800 | -0.62099600 | 1.95324600  |
| C | -3.03637800 | -1.20014800 | 1.47082300  |
| C | -1.53988100 | -0.26041700 | -1.05173000 |
| O | -1.04251900 | -1.50584600 | -0.54070200 |
| H | -3.65934300 | -1.14450400 | 2.37880300  |
| H | -2.92595900 | -2.26628600 | 1.20295300  |
| H | -0.95702500 | 0.56849900  | -0.60046800 |
| H | -1.33329900 | -0.26845100 | -2.13798000 |
| C | -0.49011100 | -1.45528400 | 0.71563300  |
| C | -3.02415900 | -0.03580100 | -0.82704700 |
| C | -3.69758300 | -0.41553500 | 0.35375100  |
| C | -5.05676200 | -0.08931700 | 0.49067800  |
| H | -5.57541800 | -0.38001600 | 1.41172700  |
| C | -3.73453000 | 0.63783000  | -1.83222300 |
| H | -3.20616700 | 0.91479800  | -2.75250700 |
| C | -5.75292700 | 0.59276800  | -0.51153400 |
| H | -6.81122800 | 0.83382600  | -0.37528000 |
| C | -5.08679800 | 0.95890200  | -1.68435000 |
| H | -5.61603100 | 1.48693300  | -2.48284000 |
| C | 0.98776200  | -1.66566700 | 0.78872400  |
| H | 1.32494600  | -1.68051000 | 1.84095500  |
| H | 1.21822300  | -2.65685700 | 0.34624300  |
| C | 1.82848200  | -0.59426300 | 0.00752500  |
| H | 1.40340900  | -0.50353600 | -1.01063000 |
| O | 4.04720300  | -1.18967300 | 0.79379800  |
| C | 4.68995200  | -2.43738800 | -1.43146100 |
| H | 5.50394900  | -1.70117300 | -1.32852300 |
| H | 4.81774500  | -3.21557100 | -0.66238100 |
| H | 4.68903000  | -2.87842000 | -2.43673600 |
| O | 3.41594800  | -1.79158500 | -1.28670700 |

RDMMAM5

-1396.5957811

|   |             |             |             |
|---|-------------|-------------|-------------|
| C | 2.47159700  | 0.51105300  | 0.65531700  |
| H | 1.74449500  | 0.63641000  | 1.48029700  |
| H | 3.40958300  | 0.14200400  | 1.10893800  |
| C | 3.04420300  | -1.43453600 | -0.86799200 |
| C | 2.72554300  | 1.91077300  | 0.02714800  |
| C | 1.39497200  | 2.57643200  | -0.39610500 |
| C | 3.69622500  | 1.82773600  | -1.17160000 |
| C | 3.34079700  | 2.74530900  | 1.08154600  |
| N | 3.82344400  | 3.39616700  | 1.91462100  |
| H | 0.94375300  | 2.01930700  | -1.23374700 |
| H | 0.68053900  | 2.58345100  | 0.44587900  |
| H | 1.57004000  | 3.61377800  | -0.72322600 |
| H | 3.23098300  | 1.25516900  | -1.99052300 |
| H | 3.94170700  | 2.83665200  | -1.53966000 |
| H | 4.63208700  | 1.31916800  | -0.88439400 |
| S | -1.57371500 | -1.06674700 | 1.81315100  |
| C | -2.86570800 | -1.70311200 | 0.67942000  |
| C | -1.88518500 | 1.05582800  | -0.28909400 |
| O | -0.90904600 | 0.03230700  | -0.51430900 |
| H | -3.45256300 | -2.44073900 | 1.25225100  |
| H | -2.33754600 | -2.25118600 | -0.12203800 |
| H | -1.69152900 | 1.52047500  | 0.69908900  |
| H | -1.69874800 | 1.81971200  | -1.06544000 |

|   |             |             |             |
|---|-------------|-------------|-------------|
| C | -0.40896700 | -0.57068200 | 0.60914900  |
| C | -3.32665800 | 0.59077600  | -0.38854300 |
| C | -3.78889000 | -0.64707400 | 0.10691000  |
| C | -5.16180600 | -0.93415800 | 0.03614800  |
| H | -5.51699000 | -1.89410200 | 0.42891400  |
| C | -4.24818900 | 1.48573700  | -0.95464900 |
| H | -3.87860300 | 2.43912300  | -1.35088100 |
| C | -6.07333400 | -0.03041000 | -0.51732100 |
| H | -7.13722100 | -0.28175900 | -0.55791300 |
| C | -5.61243700 | 1.19009300  | -1.01897000 |
| H | -6.30869100 | 1.90768600  | -1.46250300 |
| C | 0.81710200  | -1.39231300 | 0.32724500  |
| H | 1.19025500  | -1.81749900 | 1.27434500  |
| H | 0.55758700  | -2.25359000 | -0.33167200 |
| C | 1.92335300  | -0.54292700 | -0.34502800 |
| H | 1.49361400  | -0.05478000 | -1.23466600 |
| O | 3.46938200  | -1.44575200 | -2.00136400 |
| C | 4.59424200  | -3.09328500 | -0.28297100 |
| H | 4.26826800  | -3.76783100 | -1.09076000 |
| H | 5.45128300  | -2.50091300 | -0.64172500 |
| H | 4.86477600  | -3.66366000 | 0.61521500  |
| O | 3.51930100  | -2.22949700 | 0.11164600  |

TS (RDMAAM5-Oopening)

-1396.557415

|   |             |             |             |
|---|-------------|-------------|-------------|
| C | -1.78047700 | 1.10544400  | -0.76359300 |
| H | -0.78637800 | 1.35738100  | -1.18507200 |
| H | -2.51083900 | 1.14823600  | -1.59094500 |
| C | -3.15994800 | -0.93528000 | -0.12075900 |
| C | -2.13955100 | 2.20346600  | 0.28743800  |
| C | -1.00191800 | 2.41916900  | 1.31276000  |
| C | -3.45532100 | 1.91079000  | 1.04308800  |
| C | -2.30330300 | 3.46866900  | -0.46151400 |
| N | -2.42230400 | 4.46611400  | -1.04569900 |
| H | -0.84698300 | 1.49972400  | 1.90384700  |
| H | -0.05743400 | 2.68673100  | 0.81106900  |
| H | -1.26844700 | 3.23083700  | 2.00879500  |
| H | -3.32637700 | 1.00418600  | 1.66181700  |
| H | -3.69370900 | 2.75177000  | 1.71426000  |
| H | -4.29099200 | 1.74569600  | 0.34809200  |
| S | 1.48428600  | -0.35445500 | -2.20705200 |
| C | 3.12256200  | -0.88324800 | -1.63239400 |
| C | 1.61938300  | -0.07129900 | 0.96551300  |
| O | 1.02765100  | -1.57989800 | 0.06239600  |
| H | 3.78976200  | -0.72579100 | -2.49614500 |
| H | 3.03720000  | -1.97536200 | -1.47848600 |
| H | 1.04673800  | 0.63586700  | 0.35737800  |
| H | 1.22540500  | -0.21056600 | 1.97990100  |
| C | 0.50788600  | -1.25206100 | -1.06359100 |
| C | 3.07730800  | -0.03029000 | 0.83023200  |
| C | 3.75302300  | -0.25193400 | -0.40119400 |
| C | 5.14096400  | -0.04549900 | -0.44824600 |
| H | 5.66230500  | -0.20842900 | -1.39873600 |
| C | 3.83870000  | 0.29852600  | 1.97247900  |
| H | 3.31013600  | 0.44048600  | 2.92203800  |

|   |             |             |             |
|---|-------------|-------------|-------------|
| C | 5.87489500  | 0.32966000  | 0.68167100  |
| H | 6.95543200  | 0.48129700  | 0.60520800  |
| C | 5.21958100  | 0.48411700  | 1.90822800  |
| H | 5.77858200  | 0.75717300  | 2.80786500  |
| C | -0.98816800 | -1.25971600 | -1.25726600 |
| H | -1.25946000 | -0.95199500 | -2.28359900 |
| H | -1.33815400 | -2.30405700 | -1.13058400 |
| C | -1.74610900 | -0.34021600 | -0.24061400 |
| H | -1.22234100 | -0.38267700 | 0.73277100  |
| O | -4.07369900 | -0.53500200 | -0.83308400 |
| N | -3.34289300 | -1.95114800 | 0.78774500  |
| C | -4.65509300 | -2.58432100 | 0.85929800  |
| H | -5.42435300 | -1.87885600 | 0.52341300  |
| H | -4.69742900 | -3.49063400 | 0.22402000  |
| H | -4.84614000 | -2.88582000 | 1.90346000  |
| C | -2.29081800 | -2.71839400 | 1.44229200  |
| H | -2.27696300 | -3.75230700 | 1.04204000  |
| H | -1.29304700 | -2.28854300 | 1.29140000  |
| H | -2.49190200 | -2.78412700 | 2.52725000  |

TS (RDMAAM5-Sopening)

-1396.557466

|   |             |             |             |
|---|-------------|-------------|-------------|
| C | -2.33185500 | 1.06840400  | -0.72550400 |
| H | -1.52366600 | 1.55472500  | -1.30305300 |
| H | -3.22676300 | 1.02434400  | -1.36902300 |
| C | -3.11825200 | -1.33360500 | -0.41089400 |
| C | -2.62678900 | 1.94923900  | 0.52210000  |
| C | -1.32669800 | 2.24807200  | 1.30803500  |
| C | -3.68664700 | 1.28686100  | 1.43343700  |
| C | -3.16598400 | 3.23813100  | 0.03936300  |
| N | -3.58435800 | 4.25511600  | -0.33593900 |
| H | -0.91188500 | 1.31557600  | 1.73130300  |
| H | -0.56806900 | 2.69572700  | 0.64218400  |
| H | -1.52345400 | 2.94274000  | 2.14053700  |
| H | -3.27061900 | 0.36469700  | 1.87993000  |
| H | -3.97432000 | 1.96290600  | 2.25429300  |
| H | -4.58414800 | 1.01866600  | 0.85220300  |
| S | 1.40244100  | 0.80114000  | -1.88424500 |
| C | 3.24335500  | -0.74501700 | -1.74417500 |
| C | 1.93627200  | 0.13264100  | 0.97366800  |
| O | 0.95528100  | -0.65287600 | 0.27367900  |
| H | 3.76674800  | -0.70268200 | -2.70543800 |
| H | 2.50781700  | -1.54747000 | -1.66303900 |
| H | 1.71195300  | 1.20002300  | 0.77426700  |
| H | 1.72933600  | -0.07007200 | 2.03882200  |
| C | 0.50910700  | -0.20481500 | -0.92759900 |
| C | 3.41317500  | -0.11858400 | 0.71083900  |
| C | 4.00234700  | -0.36997400 | -0.56107100 |
| C | 5.41042100  | -0.27176800 | -0.67238700 |
| H | 5.85855100  | -0.44036700 | -1.65804900 |
| C | 4.25092400  | 0.11274100  | 1.81225100  |
| H | 3.79142900  | 0.28812100  | 2.79261600  |
| C | 6.22471800  | -0.01122100 | 0.42772100  |
| H | 7.31055500  | 0.03985800  | 0.30487300  |
| C | 5.64291500  | 0.16372800  | 1.68912900  |
| H | 6.26416500  | 0.35221800  | 2.56914300  |

|   |             |             |             |
|---|-------------|-------------|-------------|
| C | -0.78661400 | -0.87819400 | -1.28958100 |
| H | -1.04300800 | -0.66500300 | -2.33908900 |
| H | -0.67114400 | -1.97565000 | -1.17122200 |
| C | -1.92035400 | -0.36662400 | -0.35086500 |
| H | -1.50624400 | -0.37855200 | 0.67039100  |
| O | -4.07467900 | -1.12497700 | -1.14706800 |
| N | -3.02101900 | -2.46576400 | 0.36461500  |
| C | -2.00000300 | -2.67224300 | 1.38661100  |
| H | -0.98779500 | -2.44128700 | 1.02024400  |
| H | -2.19041100 | -2.06751400 | 2.29781700  |
| H | -2.01954300 | -3.73406300 | 1.67774000  |
| C | -4.14913500 | -3.38975300 | 0.41390300  |
| H | -4.85533700 | -3.13534800 | -0.38486900 |
| H | -3.79035500 | -4.42522900 | 0.28087800  |
| H | -4.66544000 | -3.32536900 | 1.39093900  |

TS (RMAM5-Opening)

-1377.142781

|   |             |             |             |
|---|-------------|-------------|-------------|
| C | 1.83491100  | 0.70580000  | 0.80617200  |
| H | 0.82650900  | 0.88934400  | 1.22390100  |
| H | 2.51719600  | 0.55428300  | 1.66349700  |
| C | 3.23997300  | -1.14890100 | -0.17810700 |
| C | 2.27694500  | 1.98394700  | 0.02746800  |
| C | 1.21117800  | 2.43202800  | -0.99917900 |
| C | 3.63481000  | 1.80159900  | -0.68883100 |
| C | 2.41923300  | 3.06462200  | 1.02727200  |
| N | 2.52507100  | 3.91674400  | 1.81009800  |
| H | 1.05449500  | 1.63774200  | -1.74956100 |
| H | 0.25076200  | 2.65203900  | -0.50532200 |
| H | 1.54840700  | 3.33987000  | -1.52481700 |
| H | 3.51714400  | 1.07902700  | -1.51643700 |
| H | 3.96448600  | 2.76014200  | -1.12013200 |
| H | 4.40783200  | 1.43324900  | 0.00375600  |
| S | -1.34404700 | -0.94441200 | 1.98535400  |
| C | -3.02291300 | -1.24696000 | 1.36625300  |
| C | -1.55370400 | 0.05824700  | -1.04851500 |
| O | -1.01936500 | -1.64234900 | -0.51718800 |
| H | -3.65764100 | -1.26060100 | 2.26790600  |
| H | -3.00191000 | -2.27700600 | 0.96385600  |
| H | -0.92305900 | 0.58581800  | -0.32696100 |
| H | -1.19977900 | 0.12148000  | -2.08440100 |
| C | -0.44865000 | -1.59700800 | 0.62600100  |
| C | -3.00179200 | 0.13851700  | -0.84284200 |
| C | -3.65073300 | -0.32091800 | 0.33629800  |
| C | -5.02221700 | -0.06118900 | 0.48830600  |
| H | -5.52234200 | -0.40784600 | 1.40017500  |
| C | -3.77876500 | 0.75165800  | -1.84936500 |
| H | -3.27300500 | 1.07538400  | -2.76618600 |
| C | -5.76827400 | 0.59413000  | -0.49657200 |
| H | -6.83523500 | 0.77817600  | -0.34120300 |
| C | -5.14395600 | 0.98617700  | -1.68571900 |
| H | -5.71412000 | 1.48050900  | -2.47754000 |
| C | 1.05021800  | -1.72117000 | 0.75640200  |
| H | 1.36338200  | -1.71058800 | 1.81650700  |
| H | 1.34298700  | -2.69995900 | 0.32864300  |
| C | 1.82775900  | -0.59887100 | -0.00922700 |

|   |            |             |             |
|---|------------|-------------|-------------|
| H | 1.36665300 | -0.47961100 | -1.00879900 |
| O | 4.07858400 | -1.17433500 | 0.69525600  |
| C | 4.70997100 | -2.26855400 | -1.61275800 |
| H | 5.50190800 | -1.51227800 | -1.48518400 |
| H | 4.88053000 | -3.08437900 | -0.89258000 |
| H | 4.69914400 | -2.65136500 | -2.64147900 |
| O | 3.41964900 | -1.67443700 | -1.40335800 |

TS (RMAM5-Sopening)  
-1377.142182

|   |             |             |             |
|---|-------------|-------------|-------------|
| C | 2.50037600  | 0.53669600  | 0.62477200  |
| H | 1.81265600  | 0.59839500  | 1.48981200  |
| H | 3.49610700  | 0.27726000  | 1.02997800  |
| C | 3.20209600  | -1.43987400 | -0.76297100 |
| C | 2.57995200  | 1.94572700  | -0.02997100 |
| C | 1.17147300  | 2.45641100  | -0.41214200 |
| C | 3.51737700  | 1.95153000  | -1.25783700 |
| C | 3.13772400  | 2.85763900  | 0.99183200  |
| N | 3.57936700  | 3.56968500  | 1.79698400  |
| H | 0.73893000  | 1.81404600  | -1.19897800 |
| H | 0.50063300  | 2.44135600  | 0.46441800  |
| H | 1.22730200  | 3.48550100  | -0.80149400 |
| H | 3.09872300  | 1.31788700  | -2.05633500 |
| H | 3.63544900  | 2.97638500  | -1.64435500 |
| H | 4.51142700  | 1.55379600  | -0.99436800 |
| S | -1.14141400 | -0.22480400 | 1.84622100  |
| C | -3.02890800 | -1.55410400 | 1.16325100  |
| C | -1.96454500 | 0.54803400  | -0.91459600 |
| O | -0.93142600 | -0.44335400 | -0.77787800 |
| H | -3.46168200 | -1.98204300 | 2.07406700  |
| H | -2.32349100 | -2.20838700 | 0.64712100  |
| H | -1.71549800 | 1.38918900  | -0.23773800 |
| H | -1.85906800 | 0.89869200  | -1.95557800 |
| C | -0.37464600 | -0.63621200 | 0.44095900  |
| C | -3.41332800 | 0.14767400  | -0.68261400 |
| C | -3.88737300 | -0.68980700 | 0.36709900  |
| C | -5.27839500 | -0.70365600 | 0.63023900  |
| H | -5.63696200 | -1.32970600 | 1.45504300  |
| C | -4.34535600 | 0.83829300  | -1.47171000 |
| H | -3.97512600 | 1.46759100  | -2.29001100 |
| C | -6.18673400 | 0.01291900  | -0.14628400 |
| H | -7.25649300 | -0.03712500 | 0.07706600  |
| C | -5.72002700 | 0.77713100  | -1.22239600 |
| H | -6.41674400 | 1.33353100  | -1.85558100 |
| C | 0.89622800  | -1.43442500 | 0.32324100  |
| H | 1.21800000  | -1.76835100 | 1.32119400  |
| H | 0.70072700  | -2.32808600 | -0.30367100 |
| C | 2.01343800  | -0.58471600 | -0.34008100 |
| H | 1.61101500  | -0.15410000 | -1.27237100 |
| O | 3.79172700  | -1.35004800 | -1.81621000 |
| C | 4.69787100  | -3.10659000 | -0.07206300 |
| H | 4.52177700  | -3.72113700 | -0.96916300 |
| H | 5.57903400  | -2.46878200 | -0.24694600 |
| H | 4.84557100  | -3.74063000 | 0.81177100  |
| O | 3.54612700  | -2.29937700 | 0.21475500  |

RMAM5-Sopened  
-1377.1922882

|   |             |             |             |
|---|-------------|-------------|-------------|
| C | -1.35808500 | -0.61051900 | 0.89393300  |
| H | -0.54476600 | -0.20124100 | 1.52010700  |
| H | -2.26278700 | -0.65269200 | 1.52610700  |
| C | -3.00002300 | 0.16907000  | -0.92925100 |
| C | -0.95450900 | -2.05694200 | 0.47833600  |
| C | 0.46386600  | -2.09111000 | -0.13599100 |
| C | -1.96825900 | -2.67686000 | -0.51054300 |
| C | -0.94131200 | -2.86690000 | 1.71539400  |
| N | -0.92955000 | -3.49914400 | 2.69044300  |
| H | 0.48527800  | -1.49153700 | -1.06132900 |
| H | 1.21246000  | -1.68059700 | 0.56212700  |
| H | 0.74800700  | -3.12580500 | -0.38902600 |
| H | -1.88551400 | -2.17028100 | -1.48700300 |
| H | -1.75396100 | -3.74696700 | -0.65837100 |
| H | -3.00324100 | -2.57296000 | -0.13982500 |
| S | 0.08724100  | 3.81553900  | 1.20452200  |
| C | 2.22862700  | 0.70797200  | -2.40519600 |
| C | 2.17216800  | 1.83025900  | 0.34386800  |
| O | 0.77361200  | 1.48163000  | 0.16251800  |
| H | 1.66464400  | 1.63099900  | -2.26794800 |
| H | 2.24916700  | 0.27396800  | -3.40723800 |
| H | 2.38524800  | 2.70607800  | -0.29824300 |
| H | 2.33185700  | 2.13119700  | 1.39311700  |
| C | -0.16754400 | 2.34878200  | 0.52704600  |
| C | 2.96297500  | 0.60233200  | -0.01437000 |
| C | 2.94201200  | 0.08593300  | -1.35576600 |
| C | 3.65266700  | -1.12850100 | -1.60406400 |
| H | 3.63567500  | -1.53618200 | -2.62103600 |
| C | 3.67204200  | -0.07021300 | 0.97963900  |
| H | 3.66935200  | 0.33809400  | 1.99676300  |
| C | 4.34387600  | -1.78794700 | -0.59570200 |
| H | 4.87346300  | -2.71934600 | -0.81736400 |
| C | 4.36661100  | -1.25968400 | 0.70686100  |
| H | 4.91019800  | -1.77325300 | 1.50403900  |
| C | -1.55735000 | 1.81980100  | 0.19442200  |
| H | -2.20026500 | 1.96025200  | 1.08155300  |
| H | -1.96614300 | 2.49414000  | -0.58163400 |
| C | -1.62534900 | 0.34931000  | -0.28536400 |
| H | -0.89586900 | 0.20193200  | -1.10134100 |
| O | -3.20689600 | 0.13177100  | -2.12107300 |
| C | -5.29765700 | -0.05347900 | -0.53529300 |
| H | -5.55326400 | 0.78438600  | -1.20290400 |
| H | -5.35893000 | -0.99423800 | -1.10748300 |
| H | -5.96858600 | -0.08161700 | 0.33299700  |
| O | -3.97541100 | 0.11200200  | -0.00260400 |

RMAM5-Oopened  
-1377.2110144

|   |             |             |             |
|---|-------------|-------------|-------------|
| C | -3.01889300 | 0.32245300  | -0.90720100 |
| H | -2.93901900 | 0.62822800  | -1.96784500 |
| H | -3.71449500 | -0.53607800 | -0.87237200 |
| C | -1.68325600 | -0.99128200 | 0.85703700  |
| C | -3.63608600 | 1.51553200  | -0.11841400 |
| C | -2.84946700 | 2.82348200  | -0.36404400 |

|   |             |             |             |
|---|-------------|-------------|-------------|
| C | -3.72194600 | 1.23397600  | 1.39819600  |
| C | -5.00486200 | 1.69653900  | -0.64932100 |
| N | -6.07792100 | 1.83563600  | -1.07301900 |
| H | -1.83003700 | 2.72902700  | 0.04437200  |
| H | -2.78607400 | 3.05118400  | -1.44046200 |
| H | -3.34381600 | 3.66687500  | 0.14370500  |
| H | -2.70978500 | 1.26047000  | 1.83335500  |
| H | -4.33542100 | 2.00171300  | 1.89517200  |
| H | -4.16836600 | 0.24356100  | 1.59458900  |
| S | 1.67515200  | -0.61321000 | -1.80750300 |
| C | 3.13007000  | -1.22806700 | -0.89091600 |
| C | 2.07237900  | 0.09931700  | 1.55408600  |
| O | 0.47769600  | -2.46587500 | -0.31631700 |
| H | 3.79832600  | -1.72127800 | -1.61431300 |
| H | 2.73917500  | -1.99151500 | -0.19536500 |
| H | 1.52867100  | -0.78353500 | 1.22128500  |
| H | 1.66961900  | 0.62258900  | 2.42428100  |
| C | 0.35077400  | -1.55707300 | -1.11349600 |
| C | 3.27793400  | 0.53709100  | 0.96200000  |
| C | 3.84577100  | -0.09231600 | -0.20077900 |
| C | 5.05159700  | 0.37796200  | -0.72154800 |
| H | 5.46900600  | -0.11373800 | -1.60842100 |
| C | 3.98760000  | 1.64303400  | 1.52397200  |
| H | 3.56006700  | 2.12783700  | 2.40883500  |
| C | 5.73393100  | 1.45758700  | -0.13944100 |
| H | 6.68004100  | 1.80178700  | -0.56598200 |
| C | 5.18700100  | 2.09250000  | 0.98891900  |
| H | 5.70729500  | 2.93876100  | 1.44769400  |
| C | -1.00944700 | -1.03019100 | -1.55536100 |
| H | -0.91409100 | -0.41905300 | -2.46990400 |
| H | -1.67585400 | -1.88809300 | -1.75317400 |
| C | -1.63167200 | -0.15728300 | -0.42775100 |
| H | -0.95114200 | 0.68914400  | -0.21348000 |
| O | -1.06385700 | -0.74959700 | 1.86784500  |
| C | -2.44299400 | -2.99146400 | 1.79222700  |
| H | -1.41276100 | -3.36341800 | 1.91642800  |
| H | -2.77079200 | -2.50797000 | 2.72662300  |
| H | -3.12441100 | -3.80566100 | 1.51372500  |
| O | -2.48430300 | -2.05699200 | 0.70265300  |

RDMMAM5-Oopened

-1396.630207

|   |             |            |             |
|---|-------------|------------|-------------|
| C | -0.96344400 | 0.93209200 | -0.82090600 |
| H | -0.00253100 | 0.51632400 | -1.18131000 |
| H | -1.51162100 | 1.31708200 | -1.69801900 |
| C | -3.30855900 | 0.06114000 | -0.30157200 |
| C | -0.61553900 | 2.10603500 | 0.13972500  |
| C | 0.25728100  | 1.61954000 | 1.32547100  |
| C | -1.88512700 | 2.81626800 | 0.65779600  |
| C | 0.18871400  | 3.06558000 | -0.64761500 |
| N | 0.83115600  | 3.81126900 | -1.26622000 |
| H | -0.37120300 | 1.11443600 | 2.07767400  |
| H | 1.02746700  | 0.91002600 | 0.98131700  |
| H | 0.75530600  | 2.47181100 | 1.81604300  |
| H | -2.46408300 | 2.11011500 | 1.27999300  |
| H | -1.61507600 | 3.68150400 | 1.28472600  |

|   |             |             |             |
|---|-------------|-------------|-------------|
| H | -2.52399400 | 3.14945700  | -0.17487100 |
| S | 1.08534100  | -2.22893400 | -1.70188400 |
| C | 2.65448300  | -2.22843800 | -0.78045200 |
| C | 3.38156300  | -1.67081500 | 2.12545400  |
| O | 0.32758100  | -1.92037300 | 0.80503300  |
| H | 3.40536900  | -2.57973200 | -1.51016200 |
| H | 2.57209200  | -2.98858700 | 0.00716800  |
| H | 2.98791900  | -2.67149100 | 1.95766600  |
| H | 3.71075600  | -1.42852900 | 3.13811700  |
| C | -0.01900600 | -1.91332000 | -0.36016800 |
| C | 3.41669200  | -0.66446700 | 1.13226000  |
| C | 3.02780400  | -0.85773000 | -0.23939500 |
| C | 3.04338800  | 0.23298600  | -1.11563200 |
| H | 2.72658400  | 0.07650400  | -2.15390000 |
| C | 3.84949900  | 0.64869400  | 1.51127200  |
| H | 4.15808200  | 0.79784000  | 2.55224400  |
| C | 3.44092400  | 1.51307300  | -0.70743500 |
| H | 3.41579700  | 2.34674600  | -1.41345900 |
| C | 3.85837600  | 1.71139600  | 0.62151900  |
| H | 4.17776700  | 2.70373800  | 0.95371200  |
| C | -1.43897100 | -1.55308200 | -0.79062200 |
| H | -1.52101800 | -1.49782000 | -1.89121700 |
| H | -2.11876000 | -2.34807100 | -0.43279500 |
| C | -1.79520500 | -0.18250100 | -0.15773800 |
| H | -1.52738100 | -0.24505200 | 0.90968300  |
| O | -3.75396400 | 0.79106800  | -1.17916800 |
| N | -4.13196600 | -0.58767800 | 0.58987700  |
| C | -5.57685500 | -0.46631900 | 0.43811800  |
| H | -5.80219400 | 0.32110200  | -0.28989400 |
| H | -6.01192100 | -1.42386400 | 0.09226200  |
| H | -6.03008400 | -0.21892500 | 1.41472000  |
| C | -3.73786600 | -1.57692500 | 1.58207100  |
| H | -4.08416100 | -2.58638600 | 1.28011700  |
| H | -2.65279500 | -1.61748500 | 1.73638900  |
| H | -4.21794300 | -1.33772900 | 2.54850800  |

RDMAM5-Sopened  
-1396.

|   |             |             |             |
|---|-------------|-------------|-------------|
| C | 2.61928800  | 0.25754900  | 0.25008200  |
| H | 2.72013100  | 1.28246700  | 0.65040200  |
| H | 3.48070300  | -0.33285600 | 0.60591900  |
| C | 1.51333300  | -1.90843800 | 0.99757900  |
| C | 2.64441200  | 0.34568900  | -1.30398100 |
| C | 1.65099000  | 1.42070600  | -1.80524500 |
| C | 2.34152400  | -1.02493800 | -1.95494800 |
| C | 4.00374600  | 0.76315200  | -1.70695300 |
| N | 5.06892100  | 1.09642500  | -2.03023400 |
| H | 0.62415200  | 1.15067600  | -1.49834100 |
| H | 1.89308800  | 2.40706400  | -1.37592500 |
| H | 1.67401100  | 1.49198900  | -2.90507200 |
| H | 1.28575400  | -1.29979000 | -1.77192500 |
| H | 2.49604100  | -0.97881000 | -3.04466900 |
| H | 2.98891000  | -1.81018100 | -1.53070600 |
| S | 0.65162600  | 3.07733200  | 1.75795300  |
| C | -3.94002000 | 0.09645900  | 1.42775400  |
| C | -1.89594800 | 1.99360200  | 0.40363200  |



|   |             |             |             |
|---|-------------|-------------|-------------|
| O | -1.08026600 | 1.13871200  | 1.24142200  |
| H | -3.50422900 | 0.78632100  | 2.15063200  |
| H | -4.67569500 | -0.62268600 | 1.79437500  |
| H | -2.54461700 | 2.60894400  | 1.05451000  |
| H | -1.23800700 | 2.66741400  | -0.17300600 |
| C | 0.10110700  | 1.53965100  | 1.72164400  |
| C | -2.64572400 | 1.04027200  | -0.49476700 |
| C | -3.59655000 | 0.11293800  | 0.05731100  |
| C | -4.18617100 | -0.83645700 | -0.83352200 |
| H | -4.90871700 | -1.54944100 | -0.42069700 |
| C | -2.34803500 | 0.99872000  | -1.85686400 |
| H | -1.63090900 | 1.72155900  | -2.26268700 |
| C | -3.86457200 | -0.86706800 | -2.18469100 |
| H | -4.33160600 | -1.60863000 | -2.83970700 |
| C | -2.94679900 | 0.05797900  | -2.71165700 |
| H | -2.69776700 | 0.04761900  | -3.77599300 |
| C | 0.86914200  | 0.29206000  | 2.11374500  |
| H | 1.73834900  | 0.53875000  | 2.74079600  |
| H | 0.19166700  | -0.38164300 | 2.67166000  |
| C | 1.32842700  | -0.39121300 | 0.78384300  |
| H | 0.51052100  | -0.24225400 | 0.05961900  |
| O | 2.59830500  | -2.37797700 | 1.31978200  |
| N | 0.39605500  | -2.68469800 | 0.81315100  |
| C | -0.91812900 | -2.16469400 | 0.43856500  |
| H | -1.24608600 | -1.34778100 | 1.09998000  |
| H | -0.95671200 | -1.79290800 | -0.60820600 |
| H | -1.64666200 | -2.98543200 | 0.52707400  |
| C | 0.49999600  | -4.13281000 | 0.95561200  |
| H | 1.53884100  | -4.39479500 | 1.18812800  |
| H | -0.16031700 | -4.49021500 | 1.76670300  |
| H | 0.19387400  | -4.62962000 | 0.01699500  |

**Table S7:** Cartesian coordinates and energies (a.u.) of stationary points calculated at PCM(THF@353.2K)/uMN15L/def2-TZVP, scale factor = 0.9797, R = AIBN, M5 = O,S-BMDO

| X    | opening side | $\Delta G^\ddagger(\text{forward})$ | $\Delta G^\ddagger(\text{reverse})$ | $\Delta G_r$ |
|------|--------------|-------------------------------------|-------------------------------------|--------------|
| -    | O            | 12.4                                | 38.4                                | -26.0        |
|      | S            | 13.3                                | 14.5                                | -1.2         |
| Sty  | O            | 14.9                                | 39.4                                | -24.5        |
|      | S            | 14.3                                | 23.8                                | -9.5         |
| MA   | O            | 13.0                                | 21.8                                | -8.8         |
|      | S            | 14.0                                | 9.7                                 | 4.3          |
| DMMA | O            | 13.1                                | 24.2                                | -11.1        |
|      | S            | 13.6                                | 8.7                                 | 4.9          |

**Table S8:** Activation and reaction Gibbs free energies (kcal/mol) of AIBNXO,S-BMDO ring-opening.

## 10. Elemental Composition Reports

### Elemental Composition Report

#### Single Mass Analysis

Tolerance = 5.0 mDa / DBE: min = -0.5, max = 50.0

Element prediction: Off

Number of isotope peaks used for i-FIT = 4

Monoisotopic Mass, Even Electron Ions

131 formula(e) evaluated with 3 results within limits (up to 50 best isotopic matches for each mass)

Elements Used:

C: 0-500 H: 0-1000 O: 0-200 S: 0-6

MP65\_06062023\_1 349 (2.308)

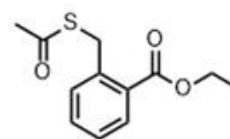

Chemical Formula: C<sub>12</sub>H<sub>14</sub>O<sub>3</sub>S

Exact Mass: 238.07

m/z: 238.07 (100.0%), 239.07 (14.1%),  
240.06 (4.5%), 240.07 (1.5%)

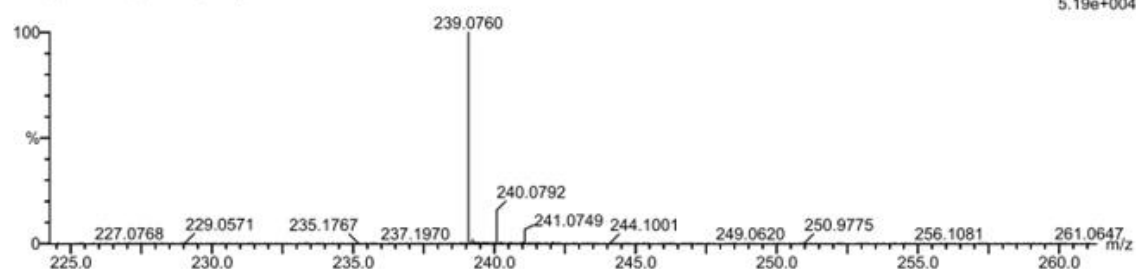

1: TOF MS ES+  
5.19e+004

Minimum: -0.5  
Maximum: 5.0 10.0 50.0

| Mass     | Calc. Mass | mDa  | PPM  | DBE | i-FIT | i-FIT (Norm) | Formula      |
|----------|------------|------|------|-----|-------|--------------|--------------|
| 239.0760 | 239.0742   | 1.8  | 7.5  | 5.5 | 612.5 | 0.0          | C12 H15 O3 S |
|          | 239.0776   | -1.6 | -6.7 | 0.5 | 623.9 | 11.4         | C9 H19 O3 S2 |
|          | 239.0767   | -0.7 | -2.9 | 1.5 | 631.8 | 19.3         | C8 H15 O8    |

Figure S34. Elemental composition report for ethyl 2-(acetylsulfanylmethyl)benzoate (5).

### Elemental Composition Report

#### Single Mass Analysis

Tolerance = 5.0 mDa / DBE: min = -0.5, max = 50.0

Element prediction: Off

Number of isotope peaks used for i-FIT = 4

Monoisotopic Mass, Even Electron Ions

159 formula(e) evaluated with 2 results within limits (up to 50 best isotopic matches for each mass)

Elements Used:

C: 0-500 H: 0-1000 O: 0-200 S: 1-6 Cl: 0-8

MP93\_06062023\_1 333 (2.195) Cm (329:336-(340:351+320:327))

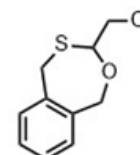

Chemical Formula: C<sub>10</sub>H<sub>11</sub>ClOS

Exact Mass: 214.02

m/z: 214.02 (100.0%), 216.02 (36.6%),  
215.03 (11.0%), 217.02 (4.2%),  
218.01 (1.4%)

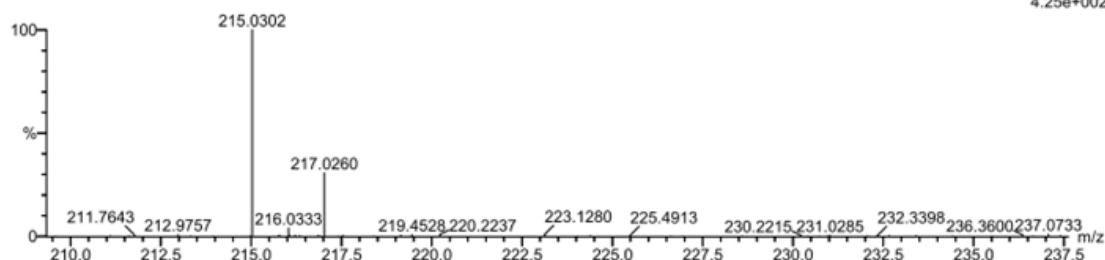

1: TOF MS ES+  
4.25e+002

Minimum: -0.5  
Maximum: 5.0 10.0 50.0

| Mass     | Calc. Mass | mDa  | PPM   | DBE  | i-FIT | i-FIT (Norm) | Formula        |
|----------|------------|------|-------|------|-------|--------------|----------------|
| 215.0302 | 215.0297   | 0.5  | 2.3   | 4.5  | 26.9  | 0.4          | C10 H12 O S Cl |
|          | 215.0331   | -2.9 | -13.5 | -0.5 | 27.6  | 1.1          | C7 H16 O S2 Cl |

Figure S35. Elemental composition report for 5,6-benzo-2-(chloromethyl)-1,3-oxthiepane (7).
